# Supplementary material for: PDGFR-modulated miR-23b cluster and miR-125a-5p suppress lung tumorigenesis by targeting multiple components of KRAS and NF-kB pathways
Source: PubMed Central journal article supplement (PMC5684387; doi:10.1038/s41598-017-14843-6), 2017-11-13

## **Supplementary Information**

**PDGFR-modulated miR-23b cluster and miR-125a-5p suppress lung tumorigenesis by targeting multiple components of KRAS and NF- $\kappa$ B pathways.**

Srivatsava Naidu, Lei Shi, Peter Magee, Justin D. Middleton, Alessandro Lagana', Sudhakar Sahoo, Hui Sun Leong, Melanie Galvin, Kristopher Frese, Caroline Dive, Vincenza Guzzardo, Matteo Fassan and Michela Garofalo

**Supplementary Figures 1S-7S**

**Supplementary Table 1S**

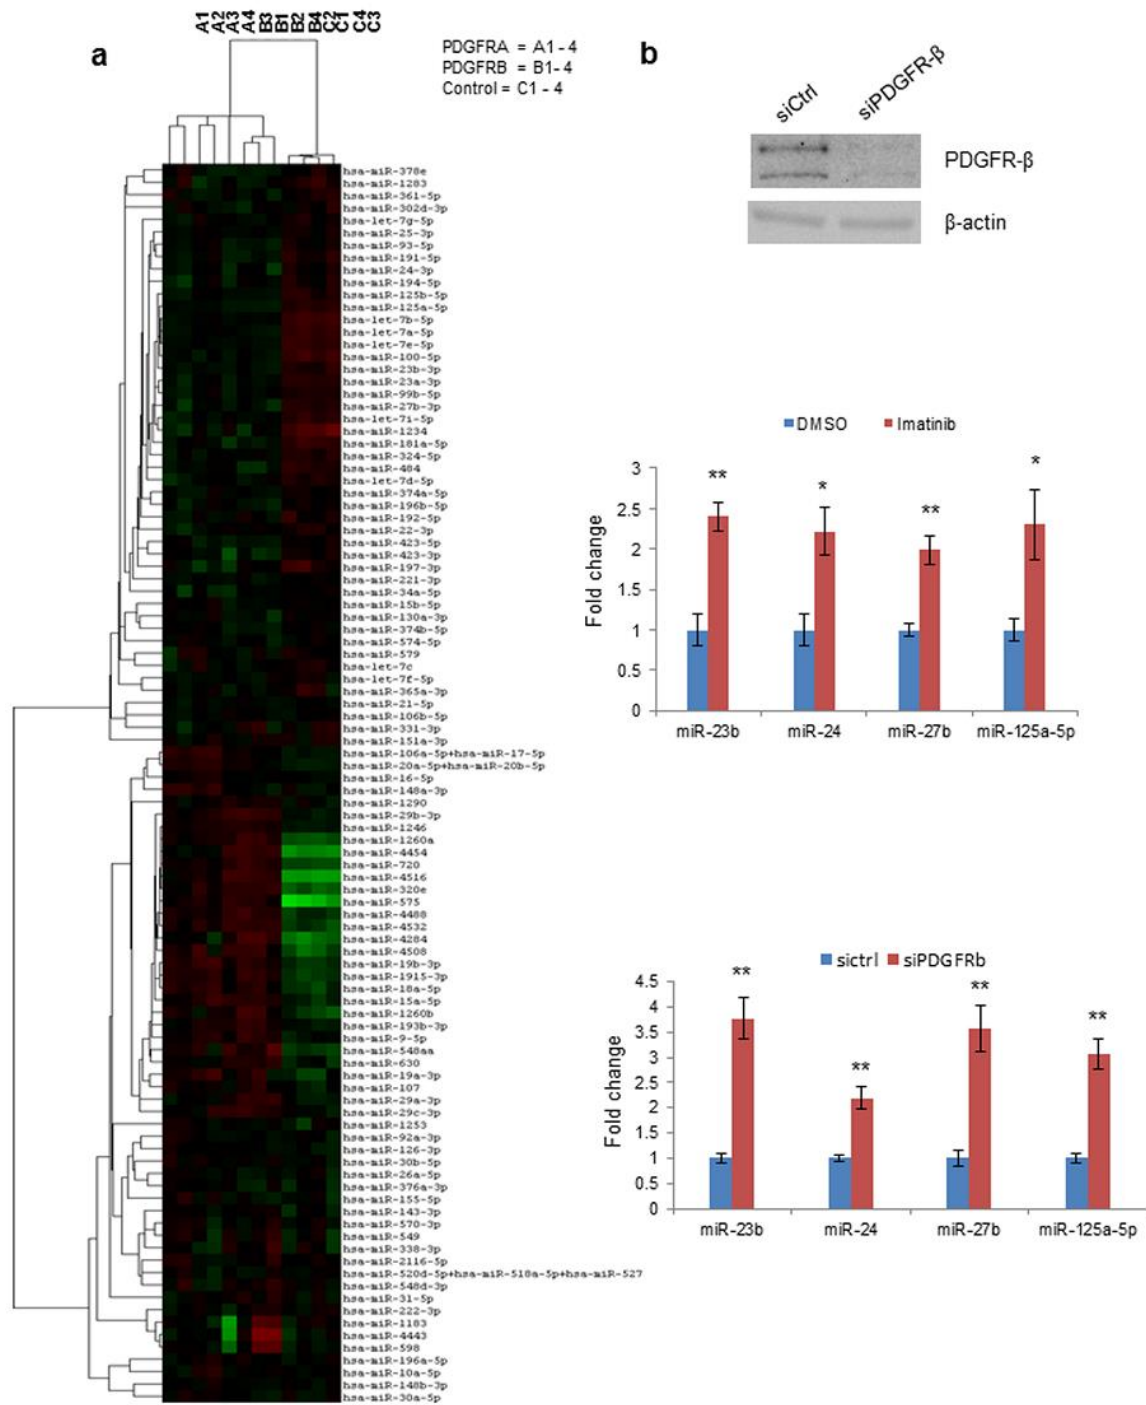

**Supplementary Figure 1. MicroRNA expression profile after PDGFR- $\alpha$  or PDGFR- $\beta$  overexpression.** **a)** Heatmap showing unsupervised hierarchical clustering of miRNAs expression in A549 cells after overexpression of PDGFR- $\alpha$  or PDGFR- $\beta$  or empty vector as control. P values were obtained by Anova ( $p < 0.05$ ). **b)** MiR-23b cluster and miR-125a-5p are upregulated after imatinib treatment or PDGFR- $\beta$  silencing in H1703 cells. Error bars indicate  $\pm$  SD ( $n=3$ ). \* $p < 0.005$ , \*\* $p < 0.001$  by two-tailed Student's t test.

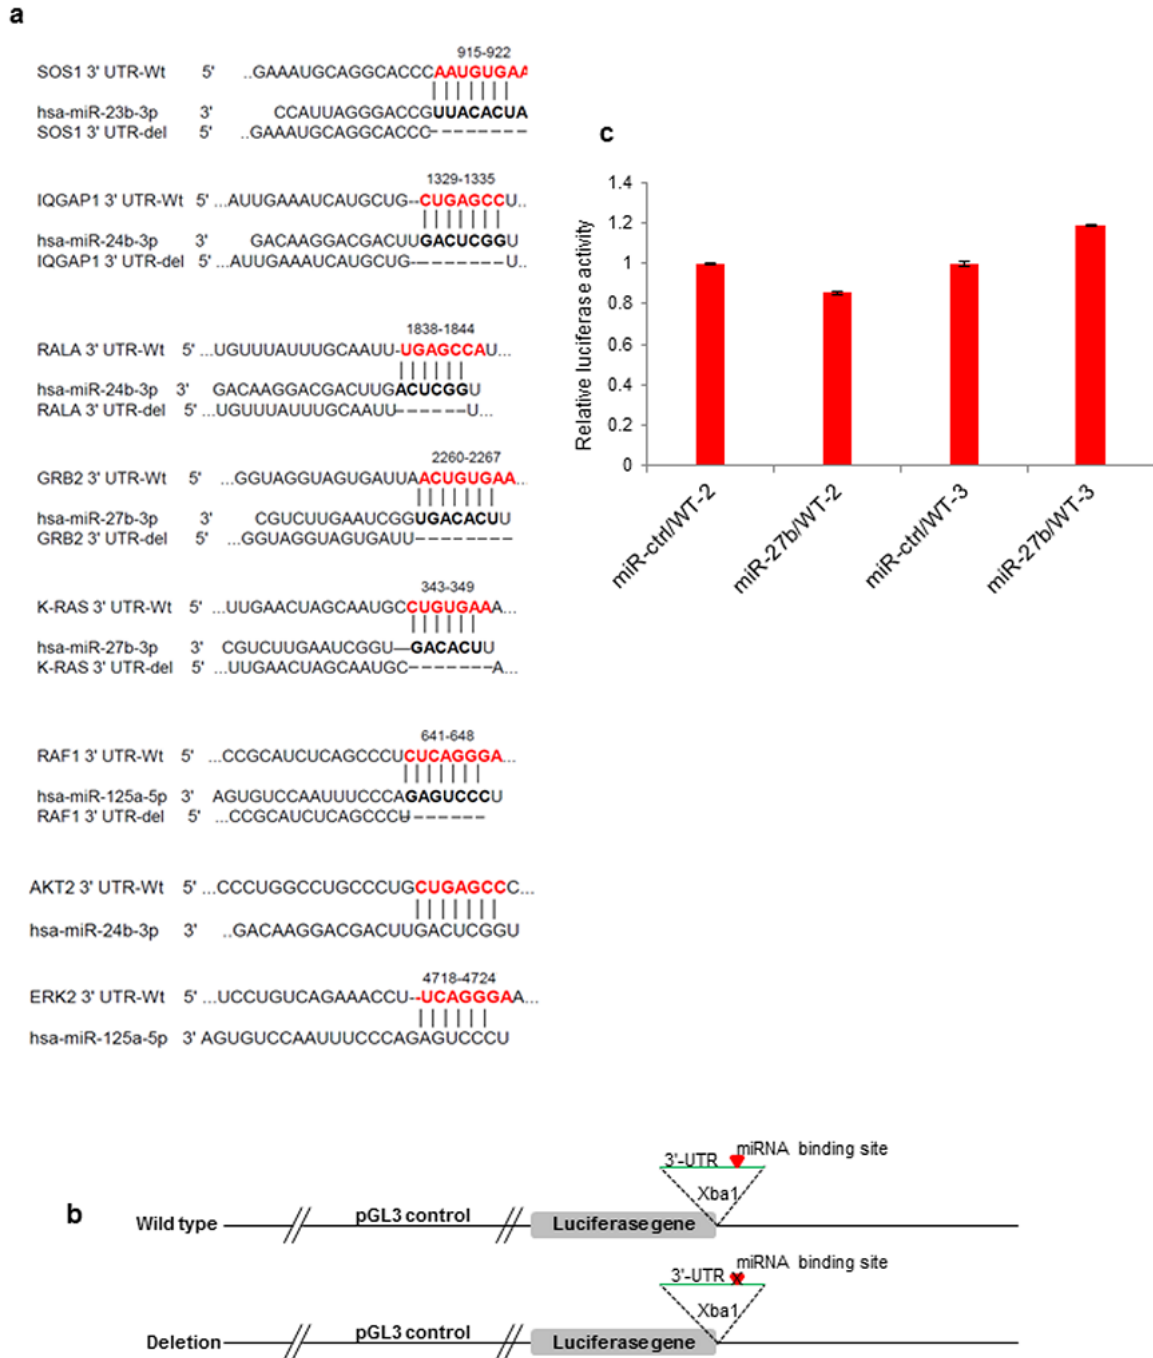

**Supplementary Figure 2. MiRNA seed sequence in the 3' UTRs of target genes.** a) In the figure the alignment of the seed regions of miRNAs with the respective target 3'UTR is shown. The sites of target mutagenesis are indicated in red. Deleted nucleotides are indicated as -. b) Schematic representation of luciferase reporter vectors containing miR-23b cluster and miR-125a-5p messenger RNA target 3'UTRs. c) Luciferase assay showing weak or no regulation for miR-27b in binding sites 2 and 3 of KRAS 3'UTR.

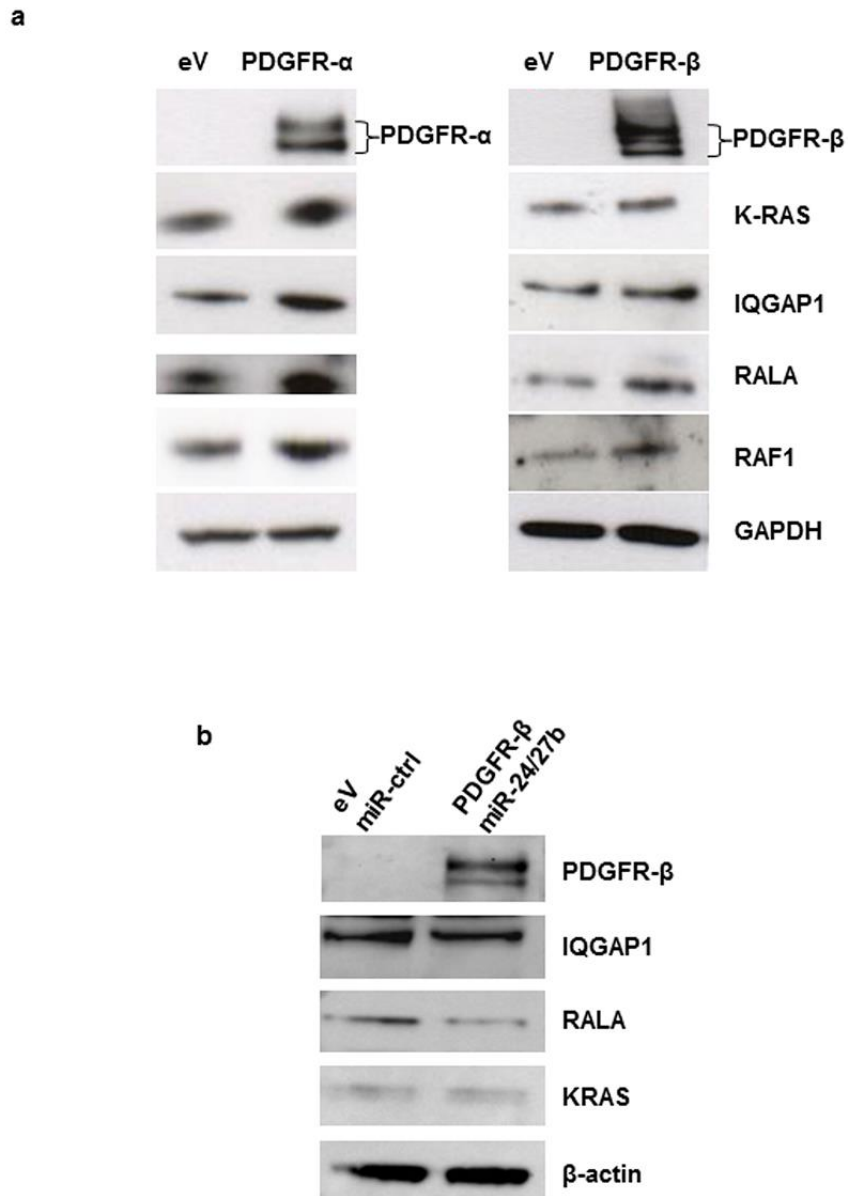

**Supplementary Figure 3. Overexpression of PDGFR- $\alpha$  and PDGFR- $\beta$  induces upregulation of miR-23b cluster and miR-125a-5p target genes.** a) A549 cells were transfected with either an empty vector (eV), PDGFR- $\alpha$  or PDGFR- $\beta$  for 48 h. Overexpression of PDGFR- $\alpha$  or PDGFR- $\beta$  induced upregulation of KRAS, IQGAP1, RALA and RAF1 as a result of miR-23b cluster and miR-

125a-5p downregulation. **b)** Enforced expression of PDGFR-  $\beta$  and miR-24/27b in A549 cells rescued the effect on target genes upregulation.

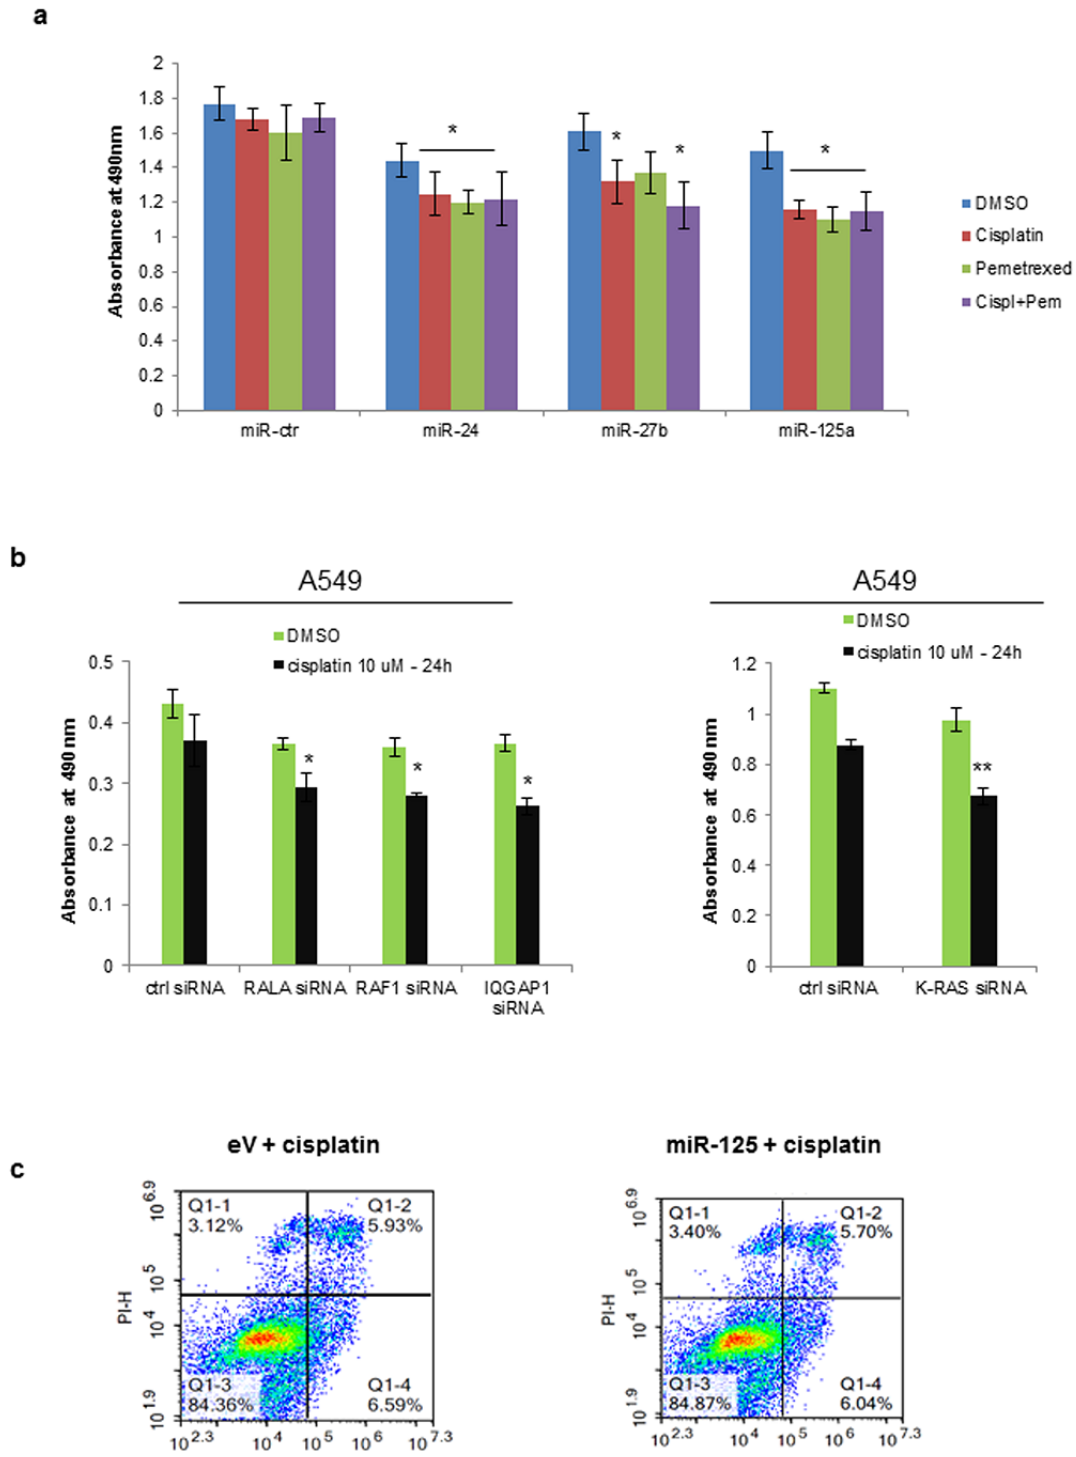

**Supplementary Figure 4. KRAS, RALA, RAF1 and IQGAP1 silencing reduces cell proliferation**

**and increases drug response.** **a)** Proliferation assay in A549 cells after miR-24, miR-27b or miR-125a-5p enforced expression and treatment with cisplatin, pemetrexed or the combination cisplatin/pemetrexed. **b)** A549 cells were transfected with RALA, RAF1, IQGAP1 and KRAS or control siRNA. 48h later, cells were treated with 10  $\mu$ M of cisplatin for 24 h and viability was assayed using MTS assay. **c)** MiR-125a-5p upregulation has no effect on apoptosis. A549 cells stably expressing miR-125a-5p were treated with cisplatin and apoptosis was assessed by Annexin V staining. Experiments were performed at least three times in triplicates. Error bars indicate  $\pm$  SD (n=3). \* $p$ <0.005, \*\* $p$ <0.001 by two-tailed Student's t test.

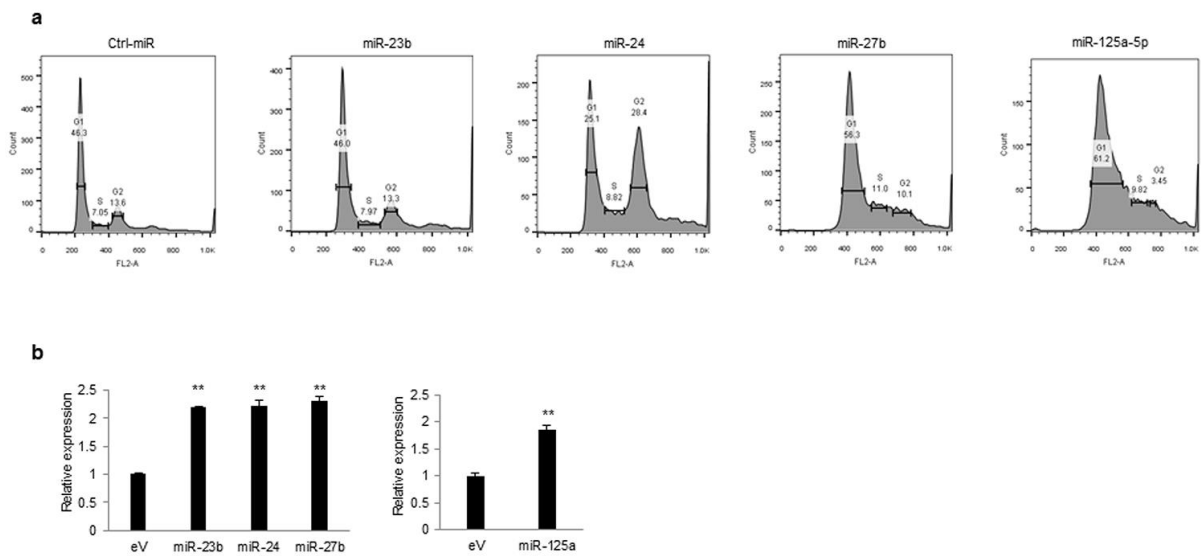

**Supplementary Figure 5. Effect of miR-23b cluster and miR-125a-5p enforced expression on cell cycle progression.** **a)** Cell cycle analysis of A549 cells transiently transfected with miR-23b, miR-24, miR-27b or miR-125a-5p. MiR-23b did not affect cell cycle progression, miR-24 blocked the cells in G2 phase whereas miR-27b and miR-125a arrested cell cycle in G1 phase. **b)** MiR-23b, miR-24, miR-27b and miR-125a-5p expression levels in A549 stable cells. Error bars indicate  $\pm$  SD (n=3). \*\* $p$ <0.001 by two-tailed Student's t test.

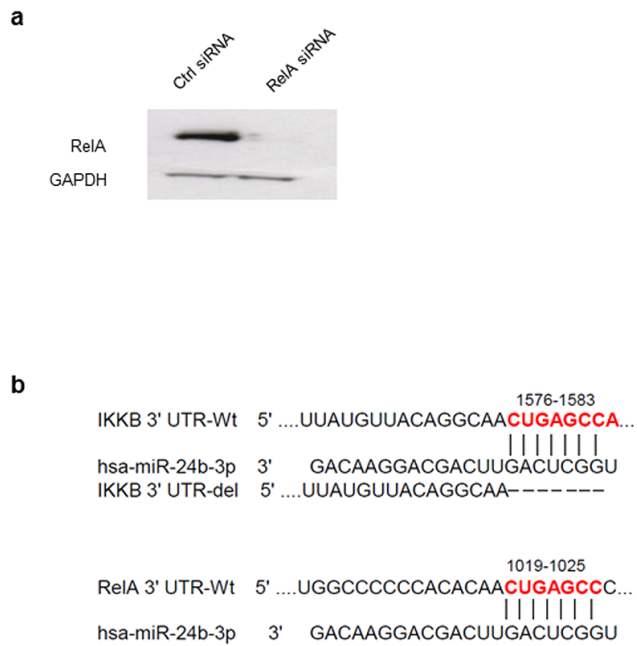

**Supplementary Figure 6. MiR-24 seed sequence in the 3' UTRs of IKK $\beta$  and RelA.** **a)** RelA silencing by siRNA compared to cells transfected with a siRNA control. **b)** In the figure the alignment of the seed regions of miR-24 with IKK $\beta$  and RelA 3'UTRs is shown. The sites of target mutagenesis are indicated in red. Deleted nucleotides are indicated as -.

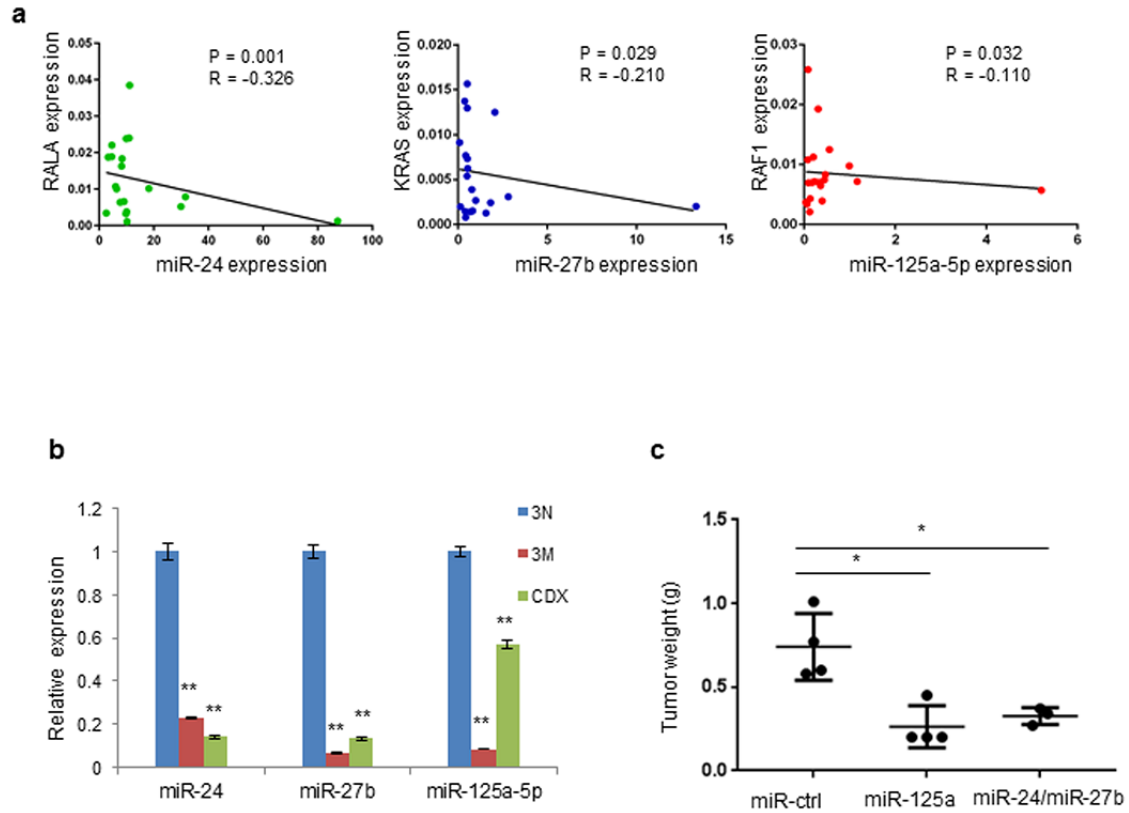

**Supplementary Figure 7. A) Expression of miR-23b cluster and miR-125a-5p *in vivo*.** a) Inverse relation between miR-24, miR-27b and miR-125a-5p and respective target genes in 24 lung tumours. b) qPCR showing downregulation of miR-23b cluster and miR-125a-5p in the CDX and tumor sample (3M) compared to normal lung (3N). c) Tumor weight for CDX mice treated with miR-ctrl, miR-125a-5p or miR-27b/24. Error bars indicate  $\pm$  SD (n=3). \* $p < 0.005$ , \*\* $p < 0.001$  by two-tailed Student's t test. Ctrl=control. R= Pearson correlation coefficient.



**Supplementary Table 1. Primers used in the study**

|                                                                                                                                 | Sense (5'-3')                                                | Antisense (5'-3')                                            |
|---------------------------------------------------------------------------------------------------------------------------------|--------------------------------------------------------------|--------------------------------------------------------------|
| <i>Primers for 3'-UTR Wt constructs</i>                                                                                         |                                                              |                                                              |
| SOS1                                                                                                                            | GTGGTGGTGTTCCTTCAAAA                                         | AAACATGAGCGGTGTCAGTG                                         |
| GRB2                                                                                                                            | ATCATGAAGCCTTGCTGAAC                                         | TGAAGAATTCATTGTGATTTATTA                                     |
| IQGAP1                                                                                                                          | TTTTATGAGCCCAAGTTTCTGGGCTTAG                                 | GGCTGTAACCATGCACCTGAGTAAAGAGTCAAA                            |
| RALA                                                                                                                            | ACATCCAGCTTCTCATG                                            | AAAAGGAAGTTTATTTGG                                           |
| K-RAS                                                                                                                           | TTCCTGCTCCATGCAGACTGTTAGC (BS1)                              | GGACATGATGCCTAGAAGAATCATC (BS1)                              |
|                                                                                                                                 | ACA ACCGGT TGCTACGATTCACATGAAAC (BS2)                        | TAT CTGCAG ACCCTACCTAAACAGTGTCC (BS2)                        |
|                                                                                                                                 | TAG ACCGGT TCCGAAAGTTCCAATCCAC (BS3)                         | TCT CTGCAG AAGGATACTTCTAACAAAGCTGC (BS3)                     |
| RAF1                                                                                                                            | CATGGGATTTTGGAAATCAGCTTCTGGAGG                               | GGCTTCCTTGTATACACATGATGTGACTAG                               |
| AKT2                                                                                                                            | AAGAACCCTGTTACAGTTGGG                                        | AGGCCTGCCTATTTTATGACCA                                       |
| ERK2                                                                                                                            | TGTTGTGAGGTGTCACATAAAATGC                                    | ATTGCCTTATACAGAATCTGGACAACAG                                 |
| MDM2                                                                                                                            | TTCTACTCTGTCTTAAATGAG                                        | CTTTCACACATTTCTCTTTATATC                                     |
| IKKB                                                                                                                            | CCCTGGTAAATGACAGTGGGA                                        | TTGTCTGTAAGTGAACAGCCA                                        |
| RelA                                                                                                                            | GCTGAACCAGGCCATACCT                                          | GAGAAGTCCATGTCCCGCAAT                                        |
| <i>Primers for 3'-UTR del constructs</i>                                                                                        |                                                              |                                                              |
| SOS1_del                                                                                                                        | GGAAATGCAGGCACCCAAGGAGCACTTGTCTGG                            | CCAGCAAGTGCTCCTTGGGTGCCTGCATTCC                              |
| GRB2_del                                                                                                                        | CGGATAGCATTGGTAGGTAGTATTATAATAAATAC<br>-ACAATGAATCTTCATC     | GATGAAGAATTCATTGTGATTTATTATAATCAC-<br>TACCTACCAAATGCATCCG    |
| IQGAP1                                                                                                                          | CCAGGAAAATATATTGAAATCATGCTCTATTTTCT-<br>TTCTTTGATGTTTGGAT    | ATCAAAAACATCAAAAGAAAGAAAATAGACAGCA-<br>TGATTTCAATATATTTTCTGG |
| RALA                                                                                                                            | AAAAAAGGAAGTTTATTTGGTCTTAAAAATTGCAAAAT<br>-AAACAAATCGGGTAGTG | CACTACCCGATTTGTTTATTGCAATTTTAAAG-<br>ACCAATAAACTCCTTTTTT     |
| K-RAS_del                                                                                                                       | GTTTGGTTTTGAAGTACGCAATGCAAGAAAGAACTGAA<br>-TACCTAAGATTTTC    | GAAATCTTAGGTATTCAGTTTCTTTGCTATTGCTA-<br>GTTCAAAAACCAAAAC     |
| RAF1                                                                                                                            | CAATCCGCATCTCAGCCAGCAGTCTTCCATCATG                           | CATGATGGAAGACTGCTGGCTGAGATGCGGATTG                           |
| AKT2                                                                                                                            | -                                                            | -                                                            |
| ERK2                                                                                                                            | -                                                            | -                                                            |
| MDM2                                                                                                                            | -                                                            | -                                                            |
| IKKB                                                                                                                            | CTGTGAGCTTATGTTACAGGCAACTGAAGAATTTTGA<br>-CGAAGAAA           | TTTCTTCGTCAAAAATCTTCTAGTTGCTGTAACA-<br>TAAGCTCACAG           |
| <i>Primers for ChIP assays</i>                                                                                                  |                                                              |                                                              |
| p53 at miR-23b-27b-24b promoter                                                                                                 | ACACAGACTGTGCACCTACCTCACTGC                                  | GATCCCTTCTCTCCAGGCAGAGATTCTAG                                |
| p53 at miR-125a-5p promoter                                                                                                     | TTGAACAAGTCTCGACCTTCTCTCTCCG                                 | CTTCTCTCTCTCTTTTCTCTCTCCCTC                                  |
| <i>Primers for cloning of sequences expressing miR-23b cluster or miR-125a into pMR-ZS1 green expression vector</i>             |                                                              |                                                              |
| miR-23b cluster                                                                                                                 | TTAGCAATTGTGTGTGTCGCA                                        | AAGTCTCAGCTCACCTCGCC                                         |
| miR-125a                                                                                                                        | CGGGCTCTTTCTGTCTTGT                                          | GGCCATCGTGTGGGTCTCAA                                         |
| <i>Primers for cloning p53 binding sites in miR-23b cluster promoter or miR-125a promoter into pGL3 basic reporter vector</i>   |                                                              |                                                              |
| miR-23b cluster                                                                                                                 | TGTGCTTATGAAAACCATTTCTG                                      | TGCAGCTTTGGAAGTGAAGA                                         |
| miR-125a                                                                                                                        | CTTAGTCCGGGAATCTCT                                           | CTCCTCCCTCCCTCTTAGG                                          |
| <i>Primers for cloning NF-κB binding sites in miR-23b cluster promoter or miR-125a promoter into pGL3 basic reporter vector</i> |                                                              |                                                              |
| miR-23b cluster                                                                                                                 |                                                              |                                                              |
| Site 1                                                                                                                          | TGTGAGTGTTTGCGGCATTG                                         | ACTTGTGGTCTAGAAATTGCA                                        |
| Site 2                                                                                                                          | GTTAGCCAAGACTACCCGCA                                         | CGGCCGCTTAAACTCTGTA                                          |
| Site 3                                                                                                                          | CTGAGCGTCTCGTAGCGAAA                                         | GCCATGCGACACACAAAT                                           |
| miR-125a                                                                                                                        |                                                              |                                                              |
| Site 1                                                                                                                          | TTTTCTGAGCCCTGCTCTGAG                                        | CTCACAAAGTATGTGATGGAGCT                                      |
| Site 2                                                                                                                          | CAGGATCCAGGAGTCTGAGC                                         | AGAGGGGAAGCCGAGAAT                                           |
| Site 3                                                                                                                          | CCTGGAGTCTCTGCAGACTGA                                        | GATGCAGGGACAAGGACAGA                                         |

Wt, wildtype; del, deletion; BS=binding site

Uncropped western blots

Fig.1A

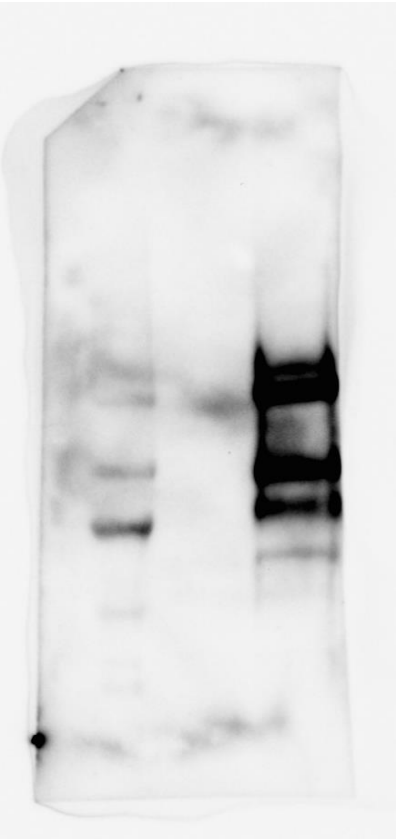

PDGFRA

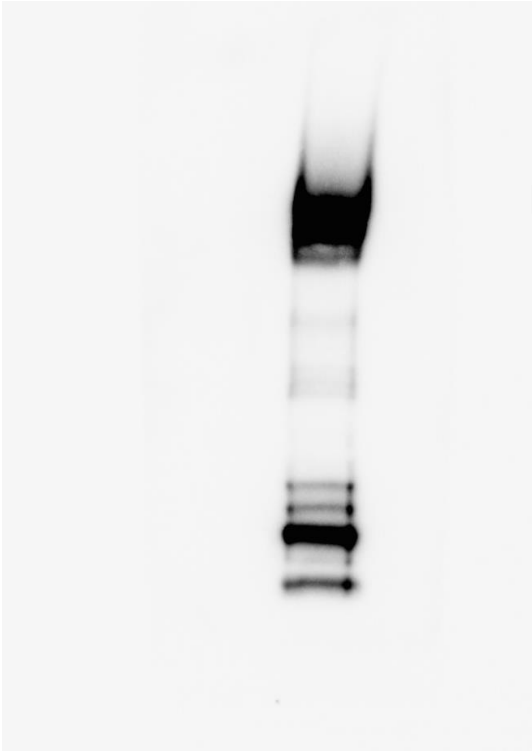

PDGFRB

Fig.1A

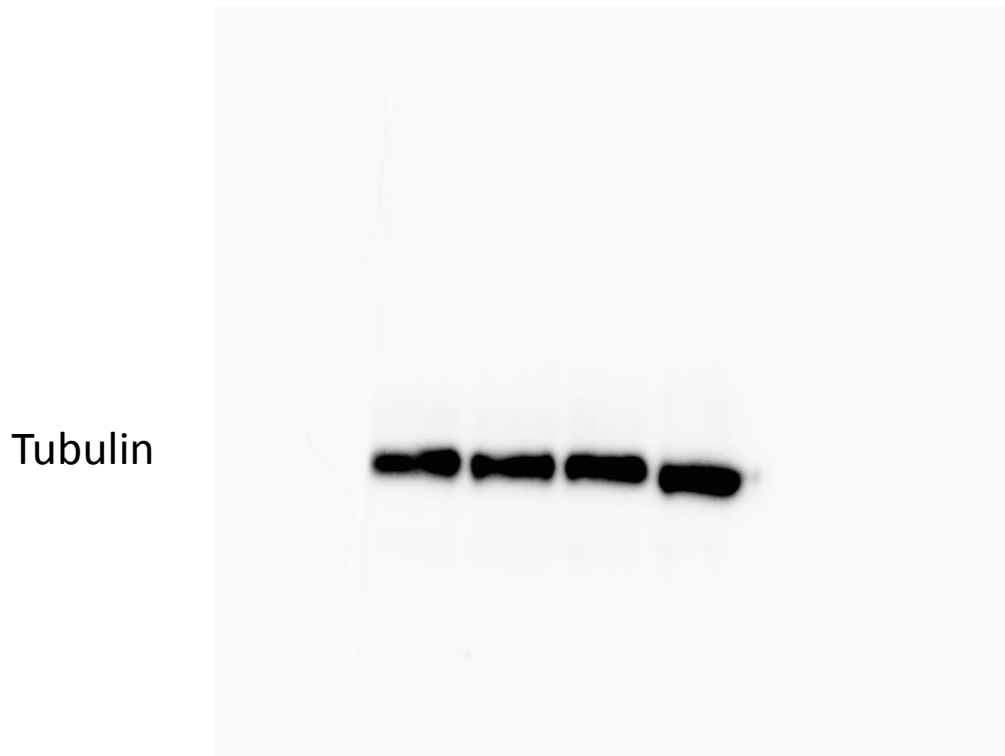

Fig.1E

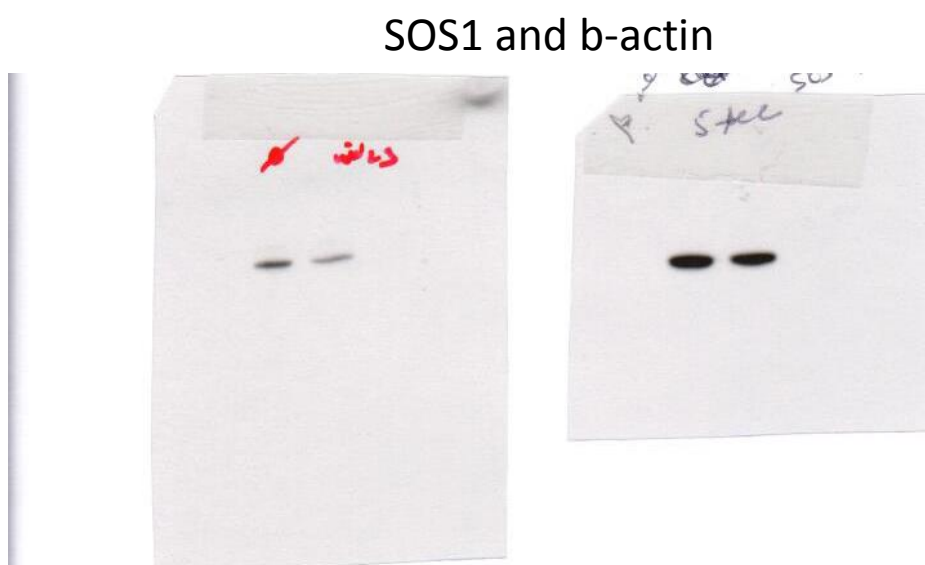

Fig.1E

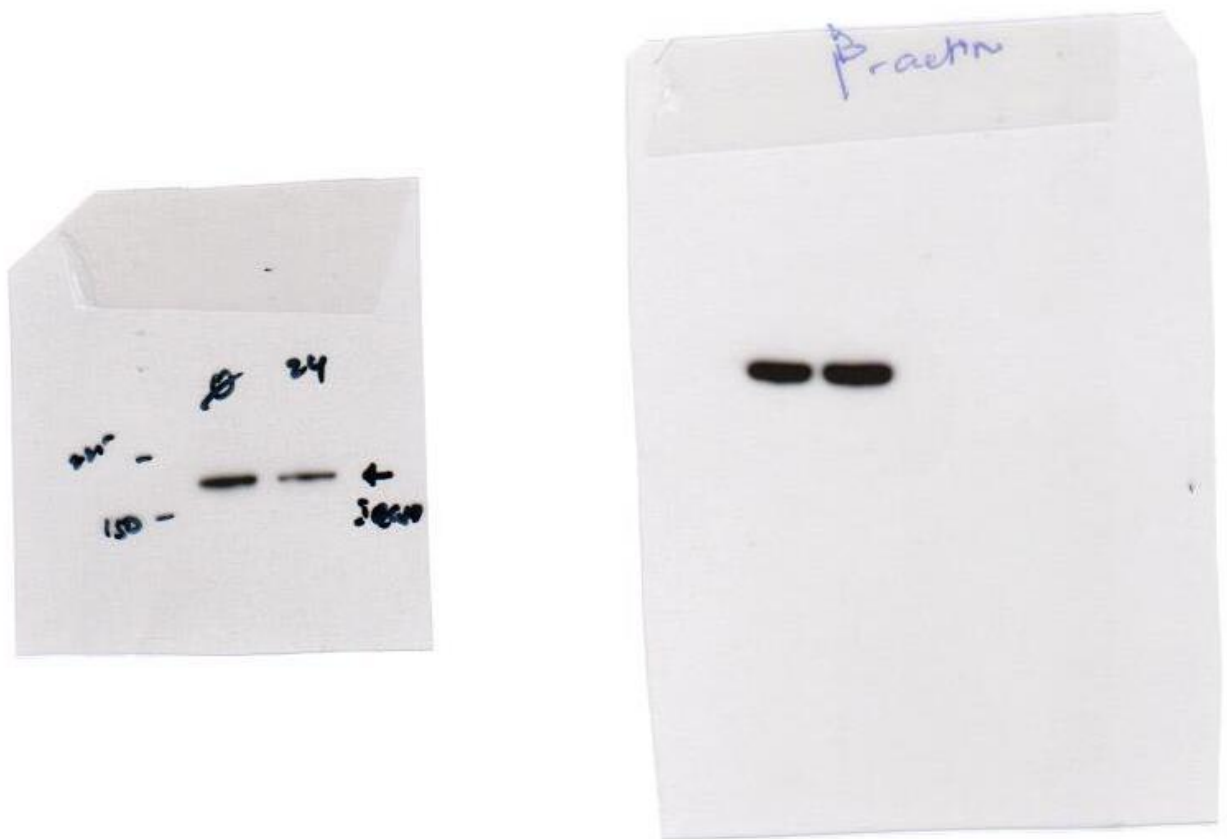

Fig.1E

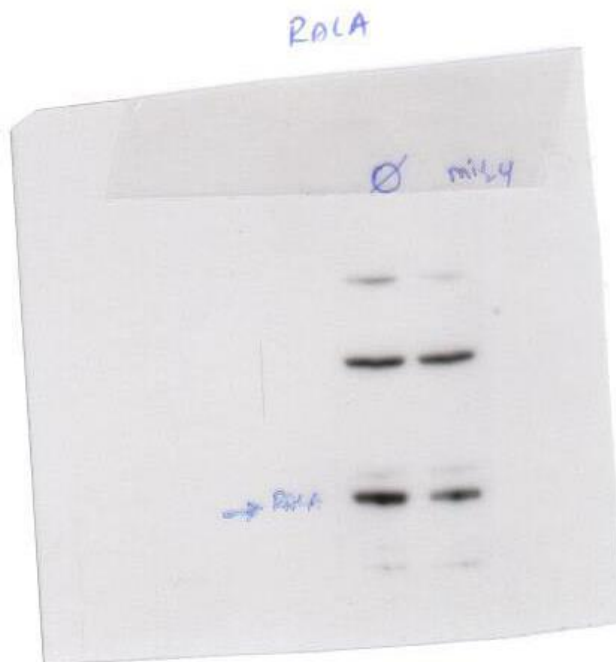

Fig.1E

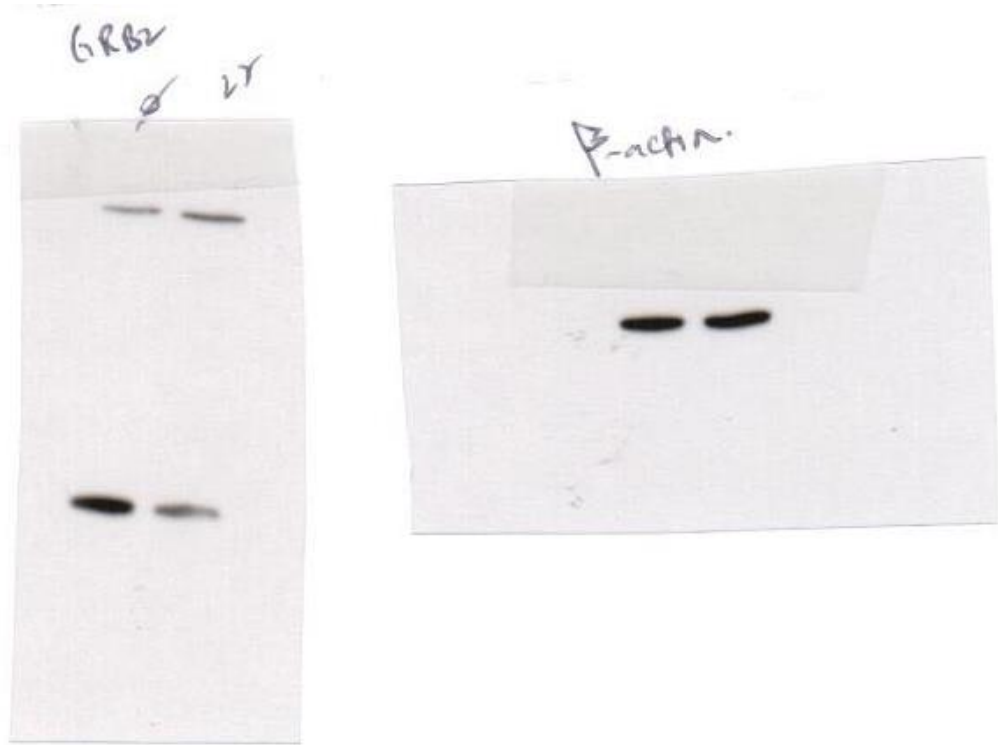

Fig.1E

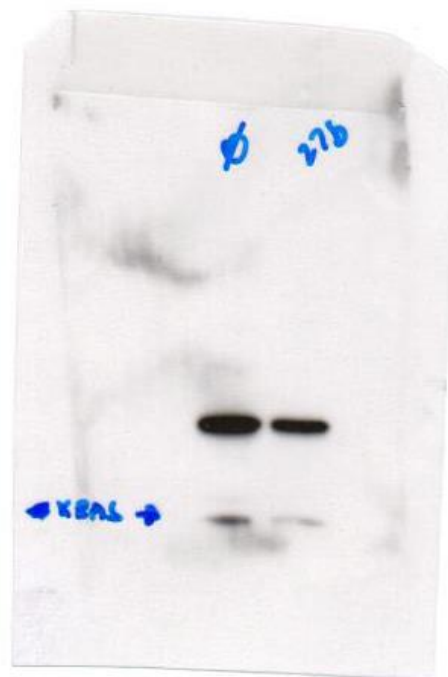

Fig.1E

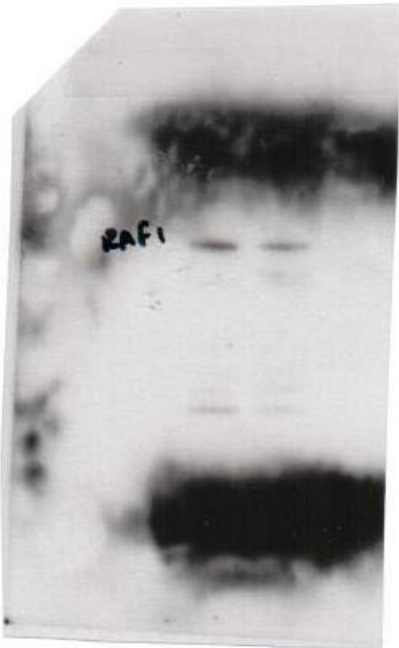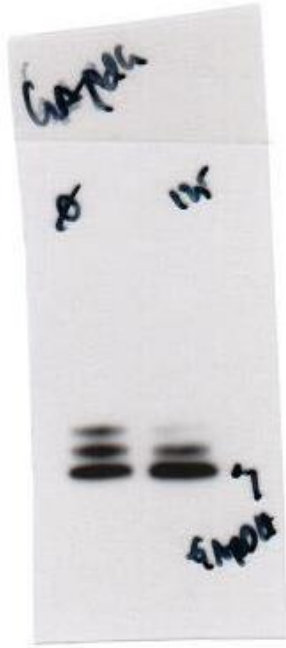

Fig.2A

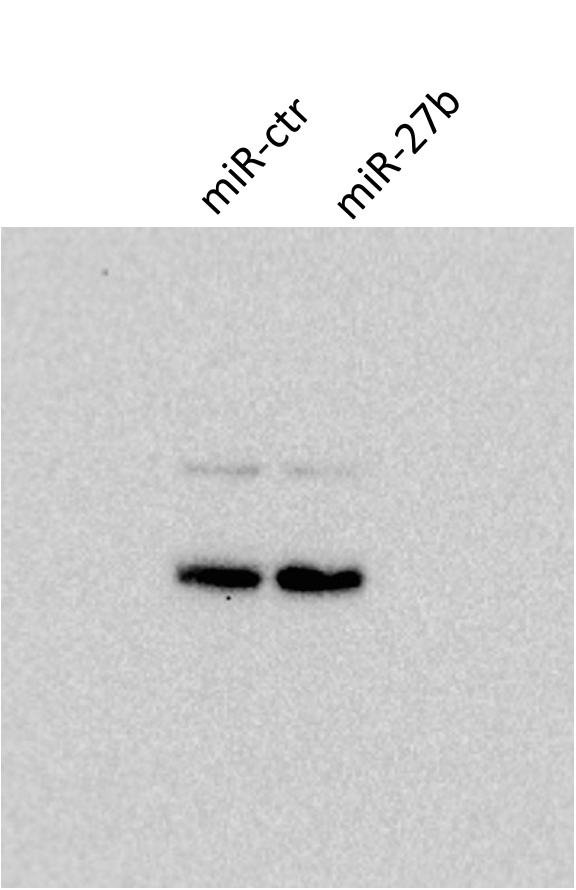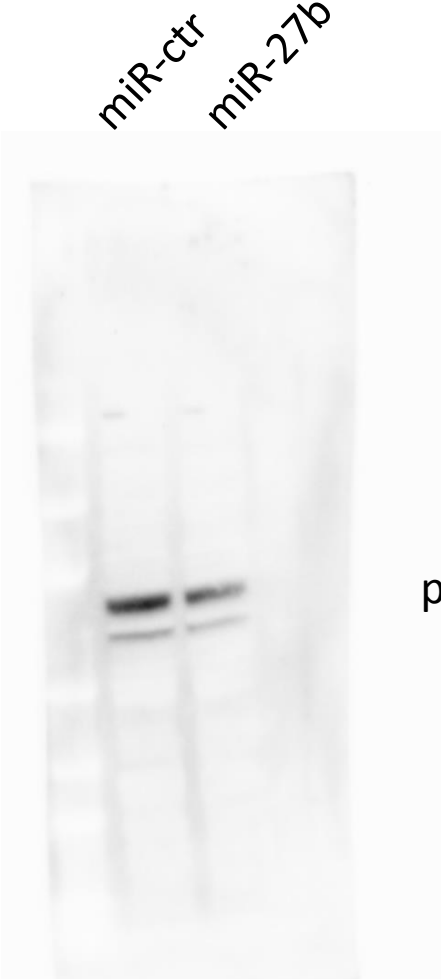

Fig.2A

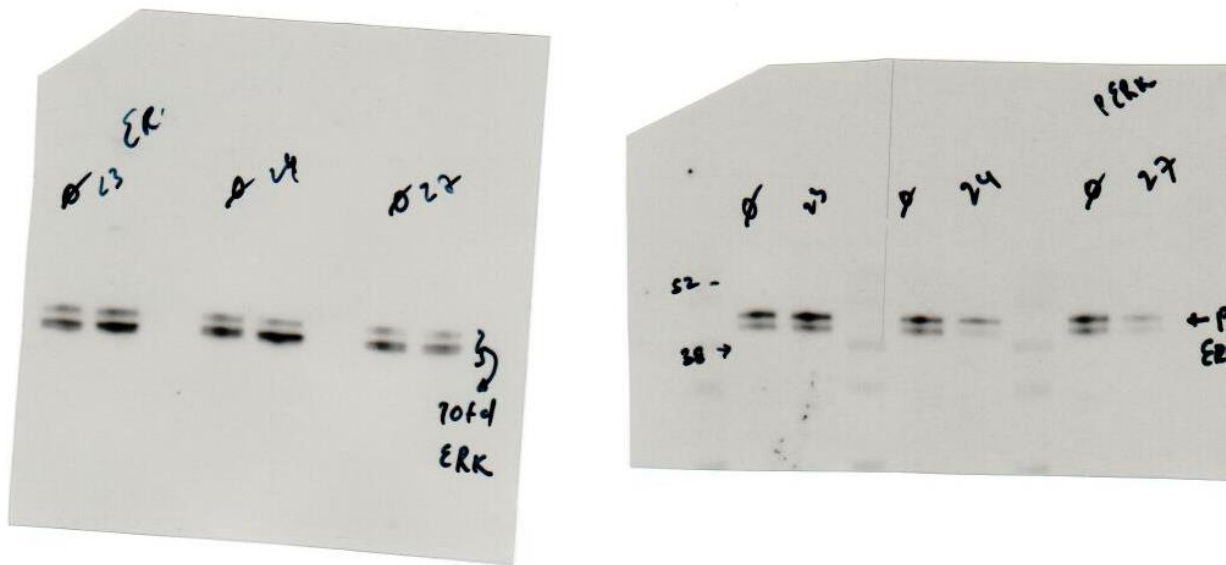

Fig.2A

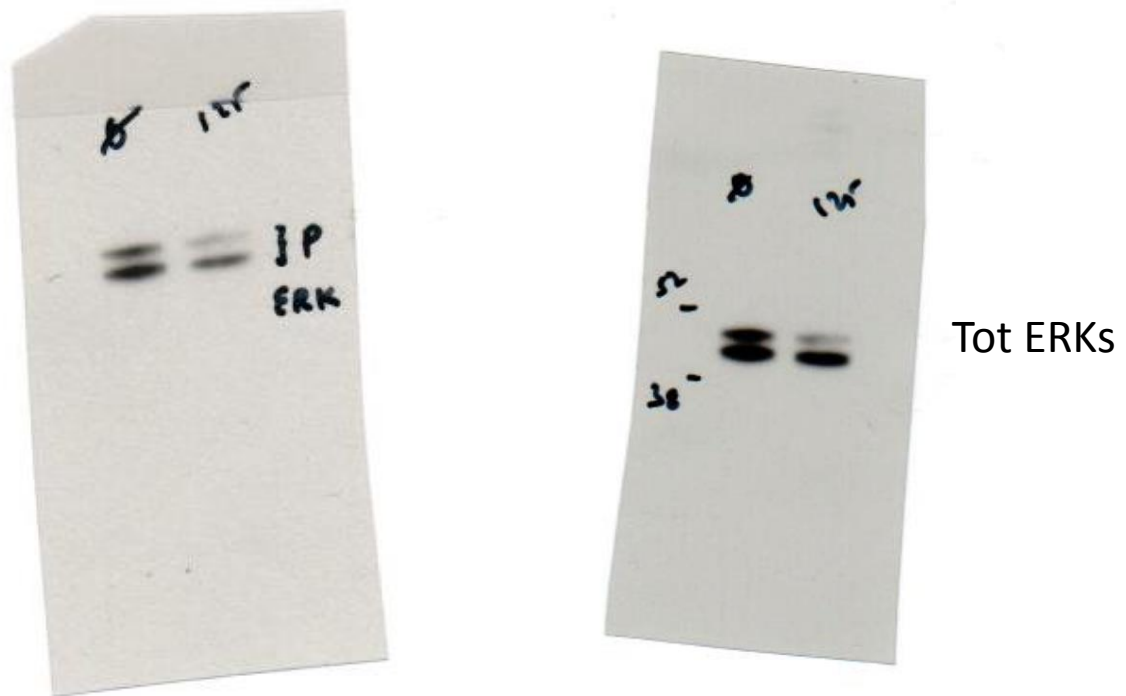

Fig.2A

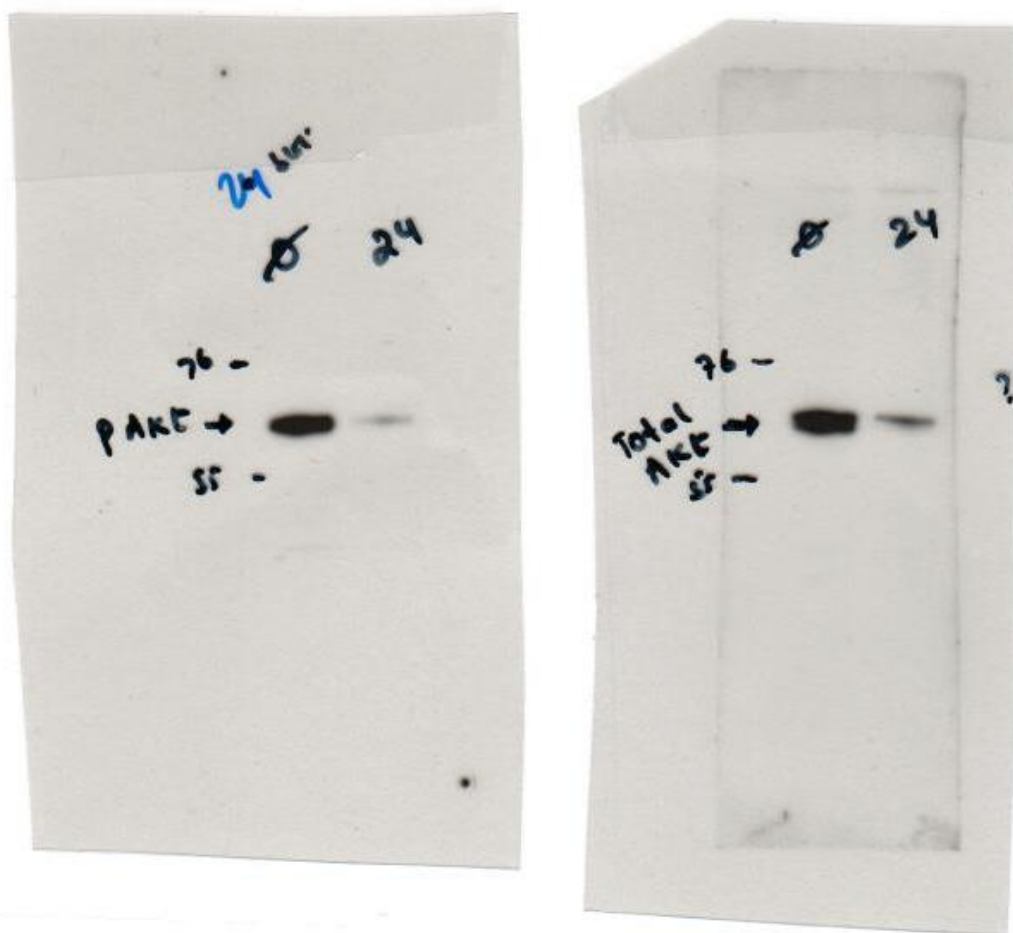



Fig.2D

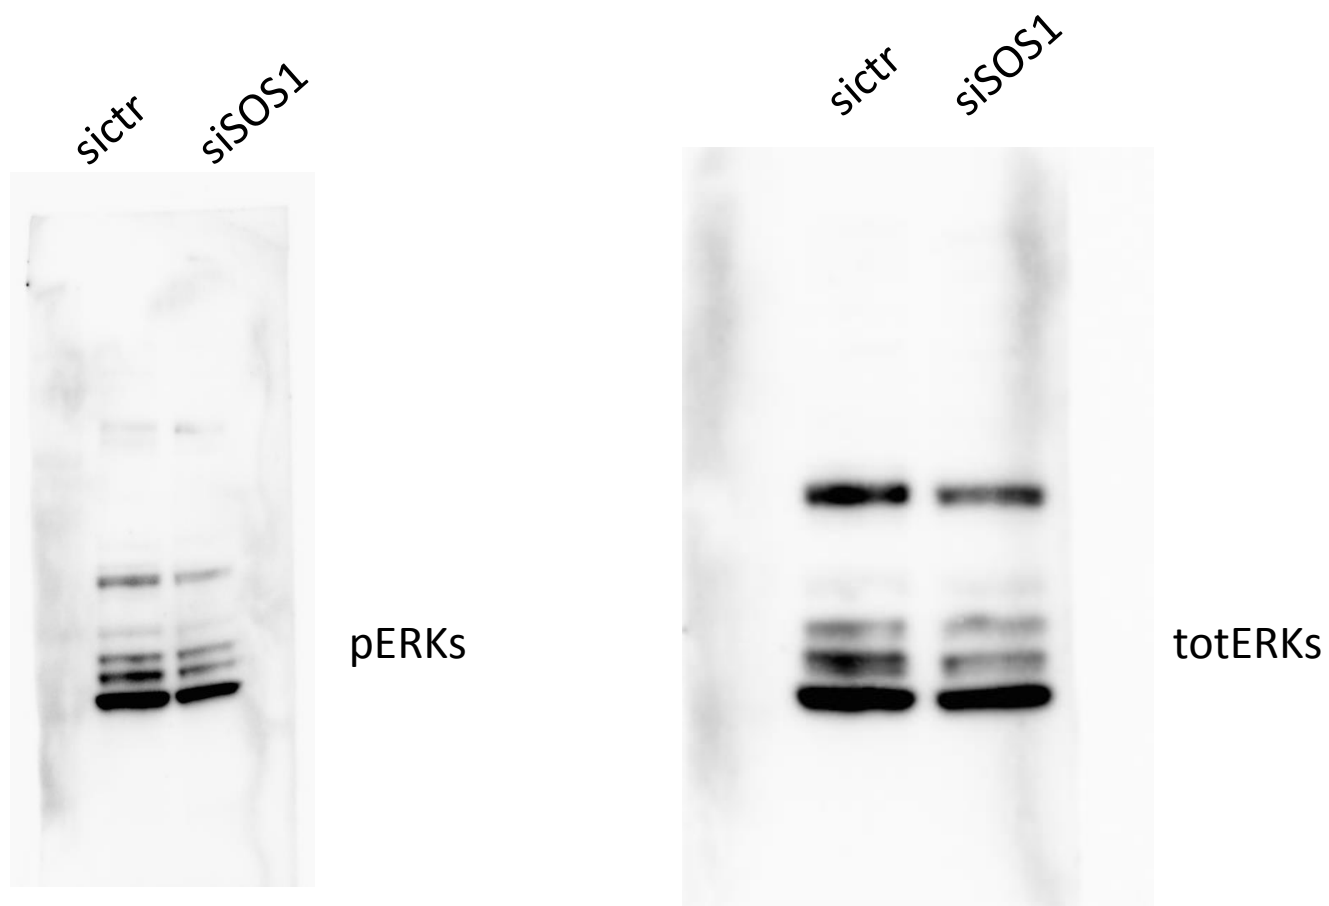

Fig.2A

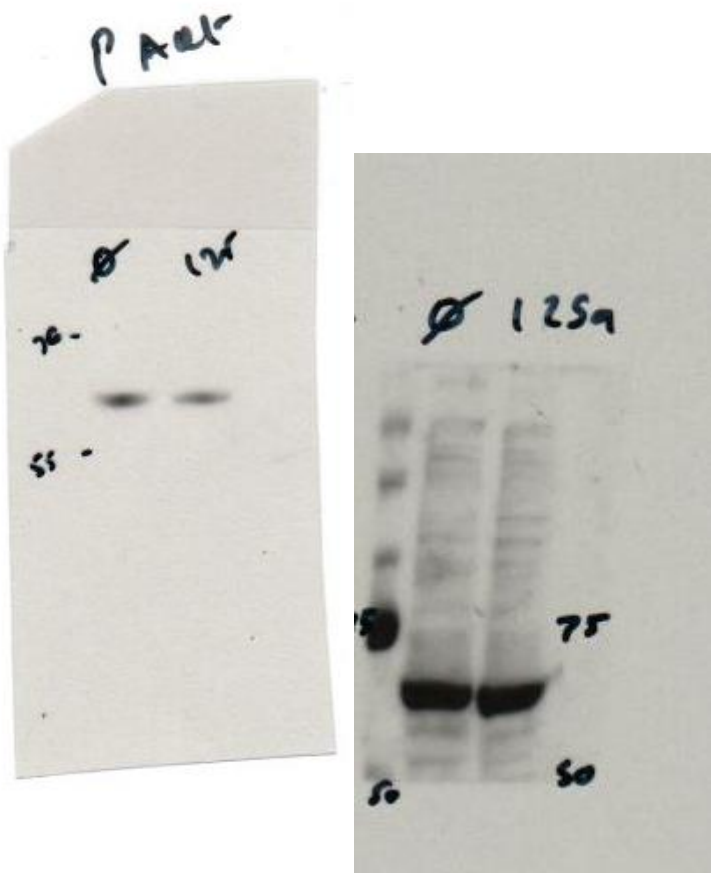

Tot AKT

Fig.2A

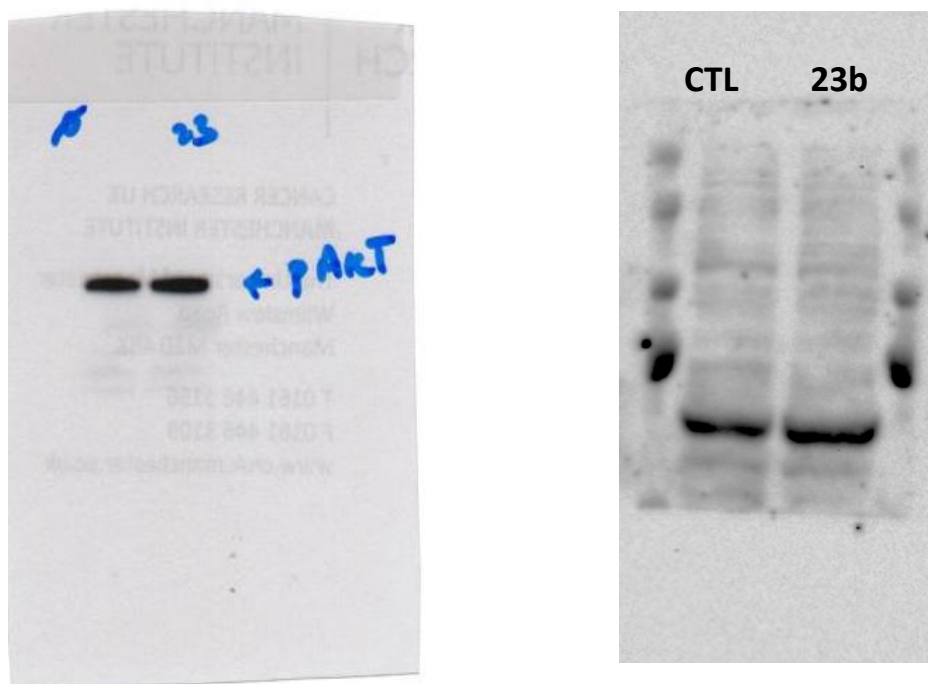

Tot akt

Fig.2B

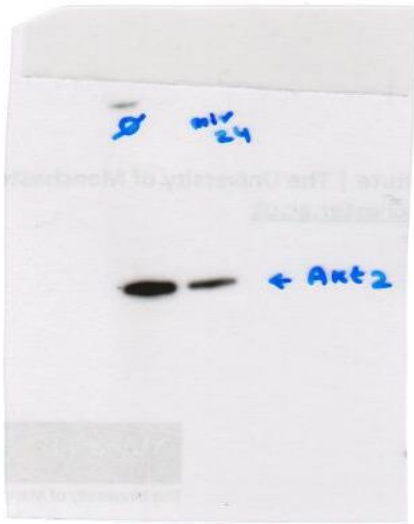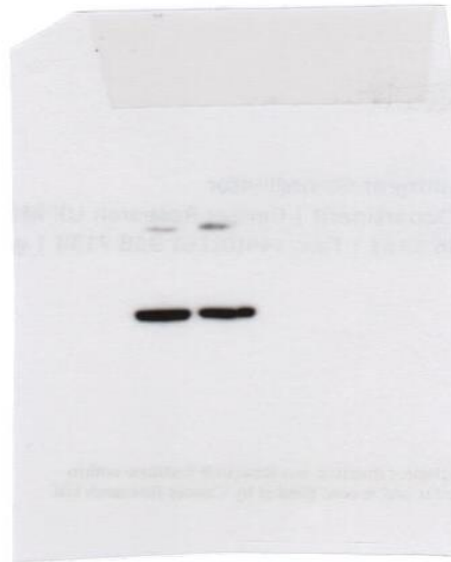

Fig.2B

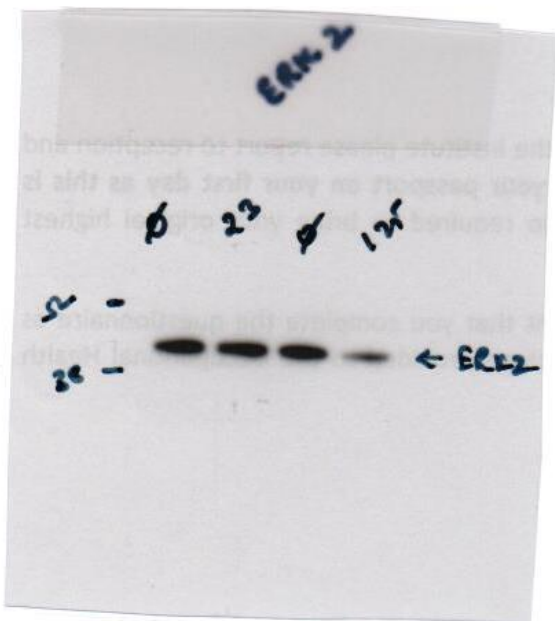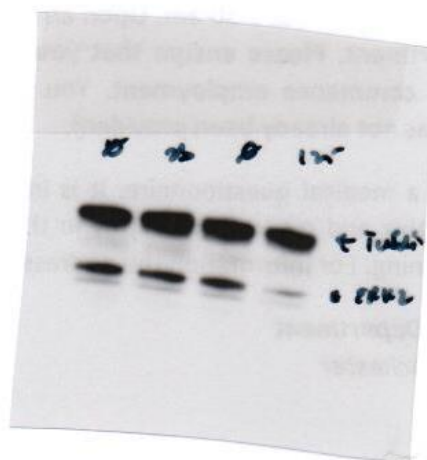

Fig.2D

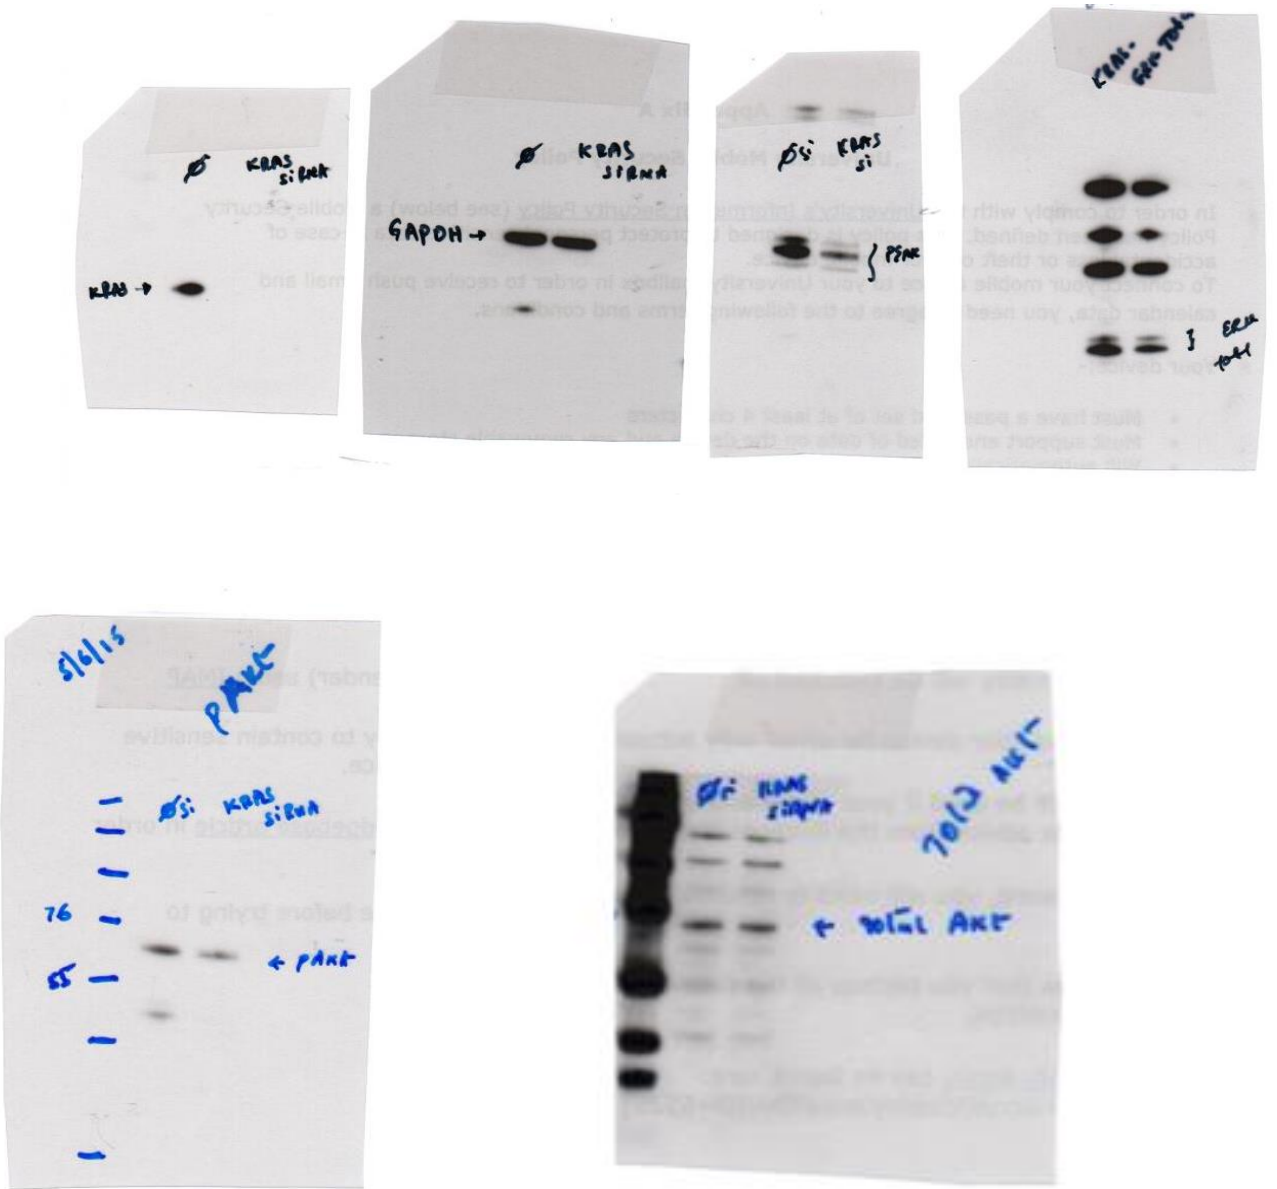

Fig.2D

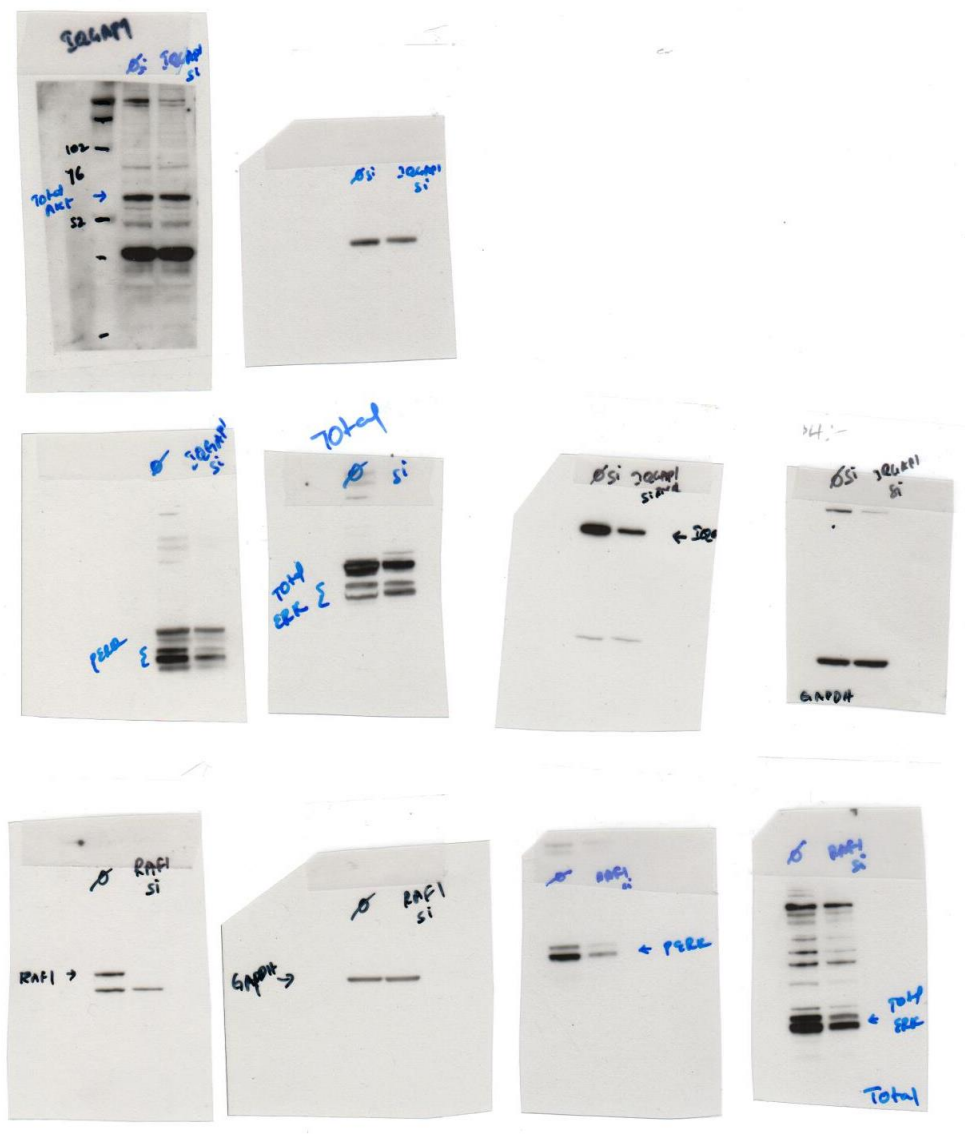

Fig.2D

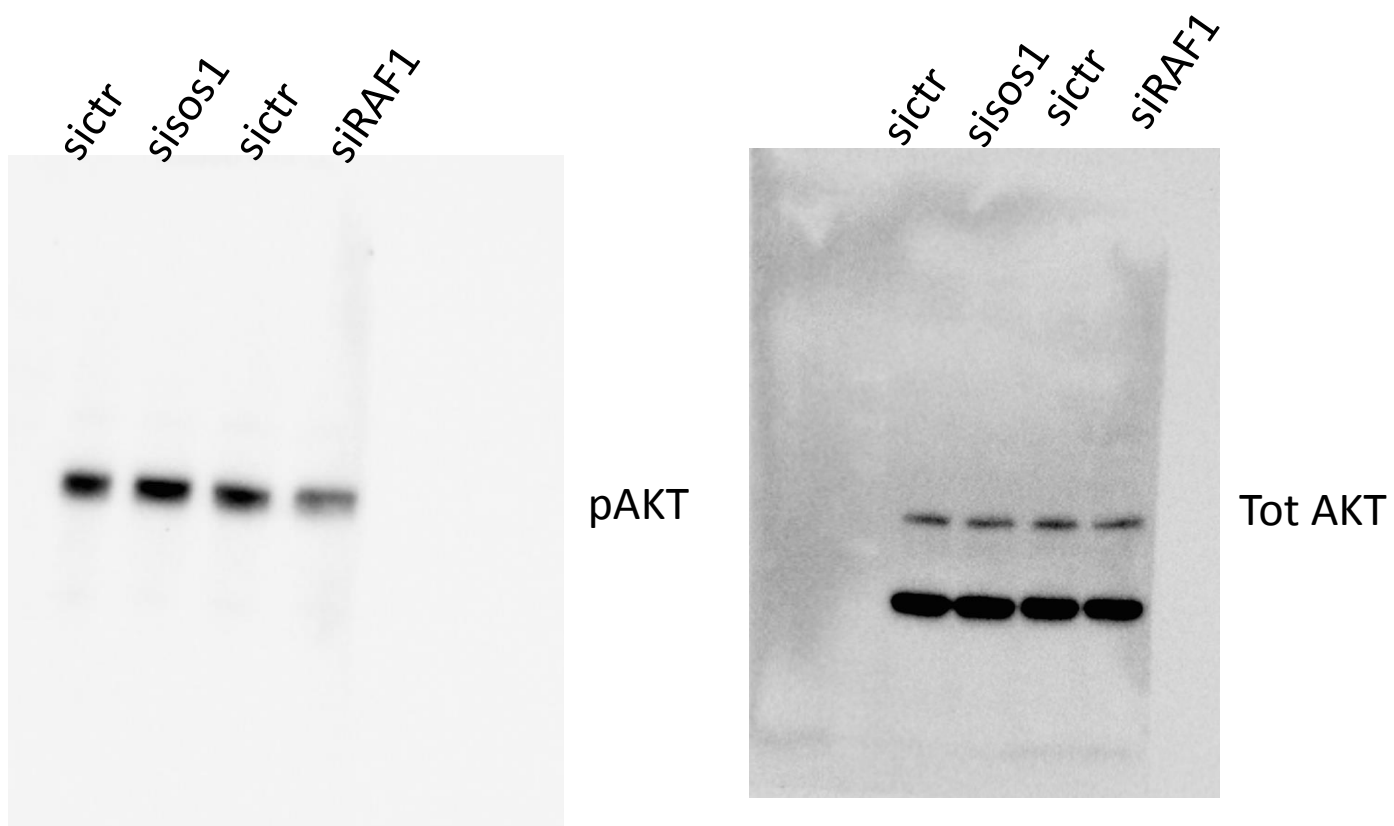

Fig.2D

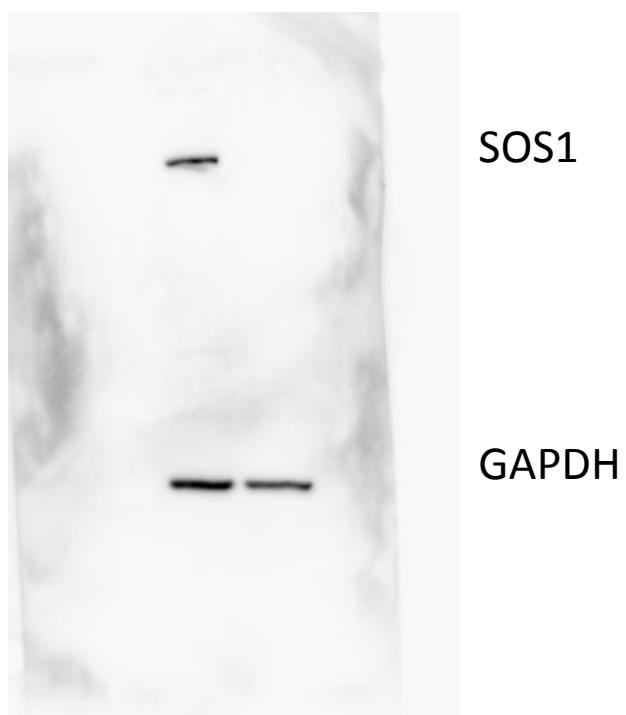

Fig.4B

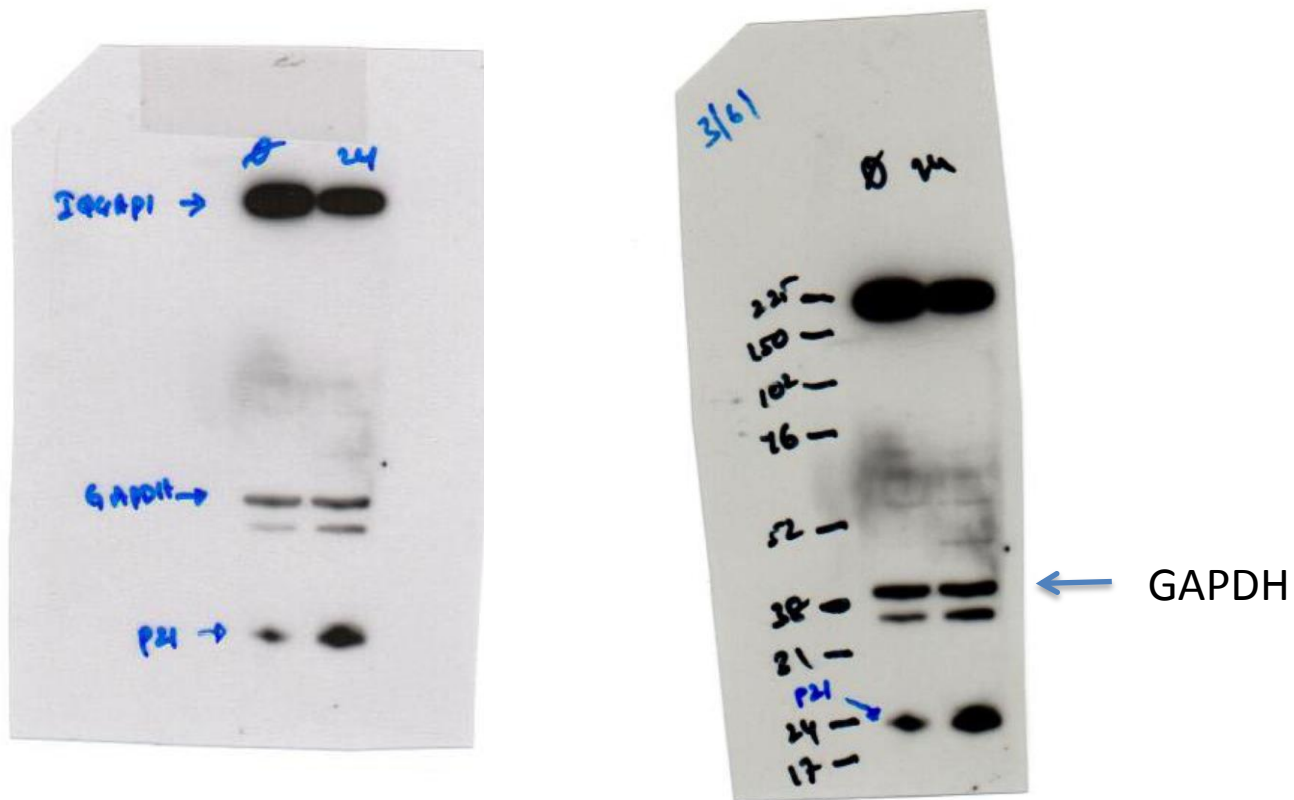

Fig.4B

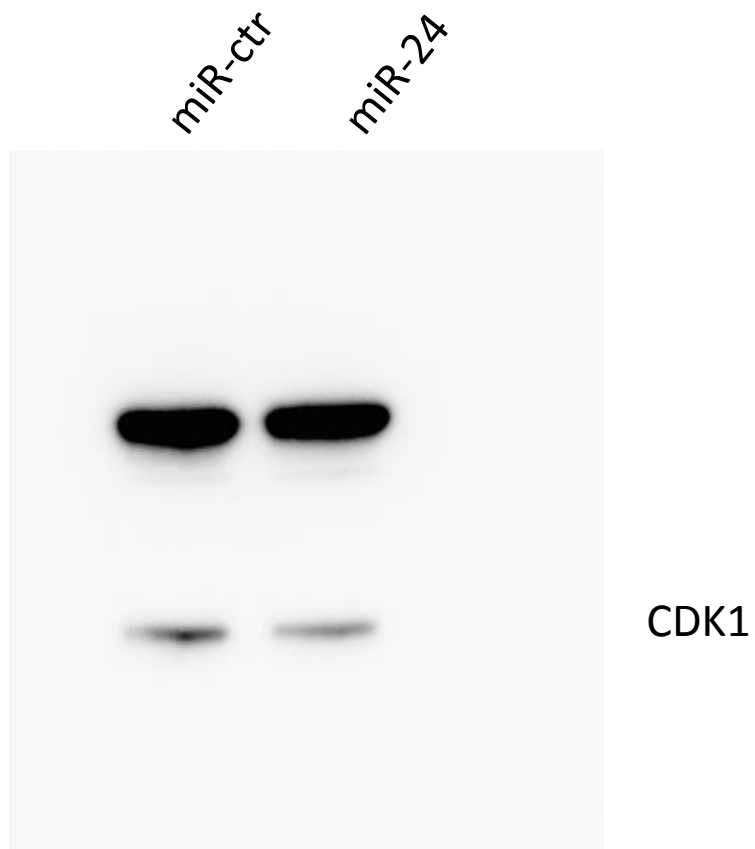

Fig.5D

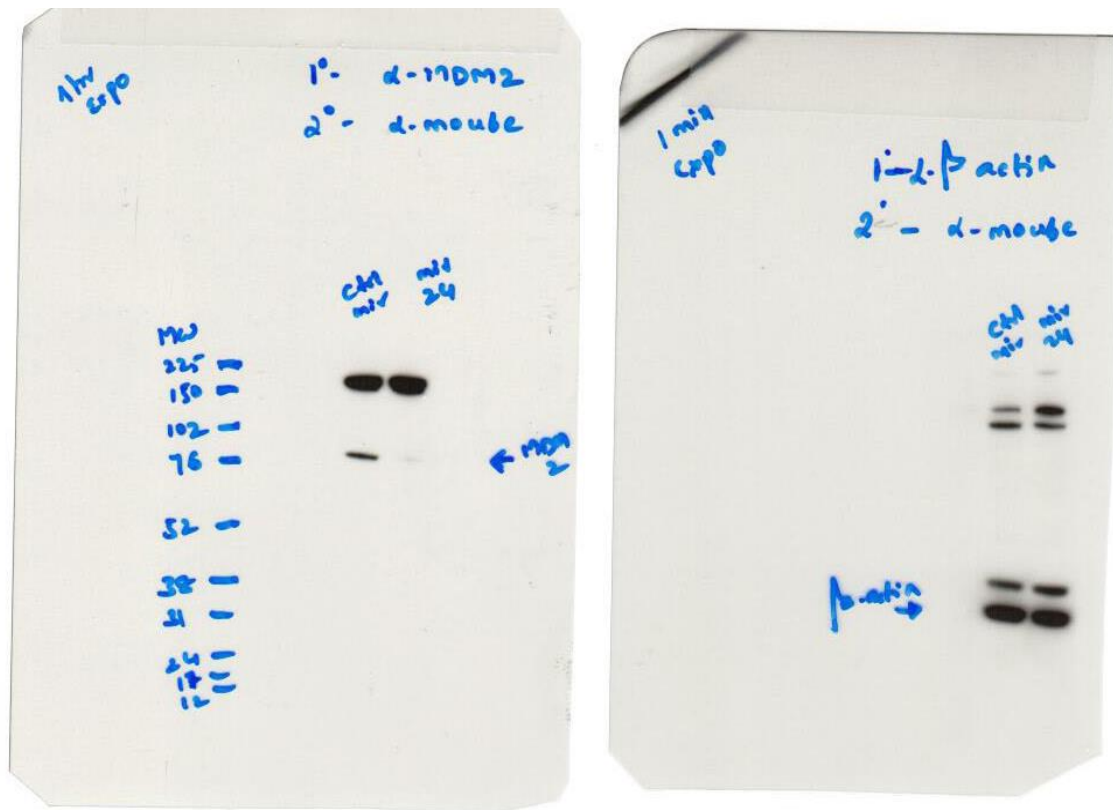



Fig.5D

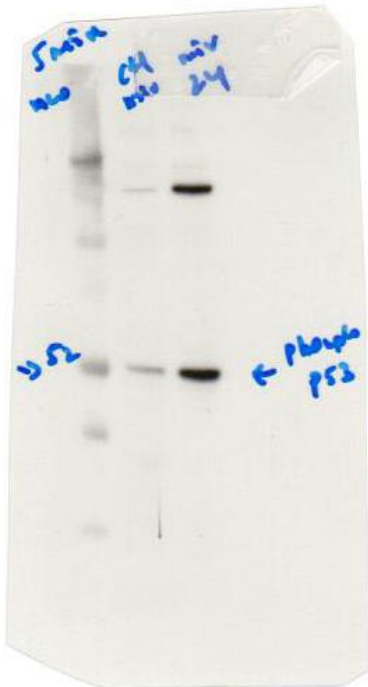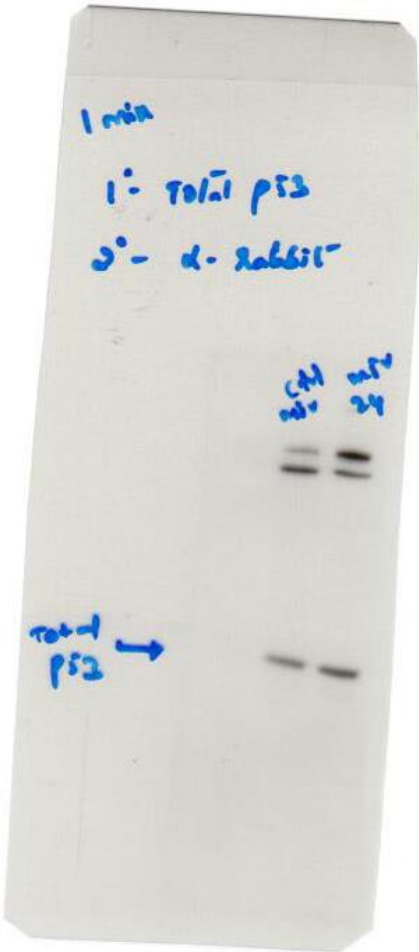

Fig.5E

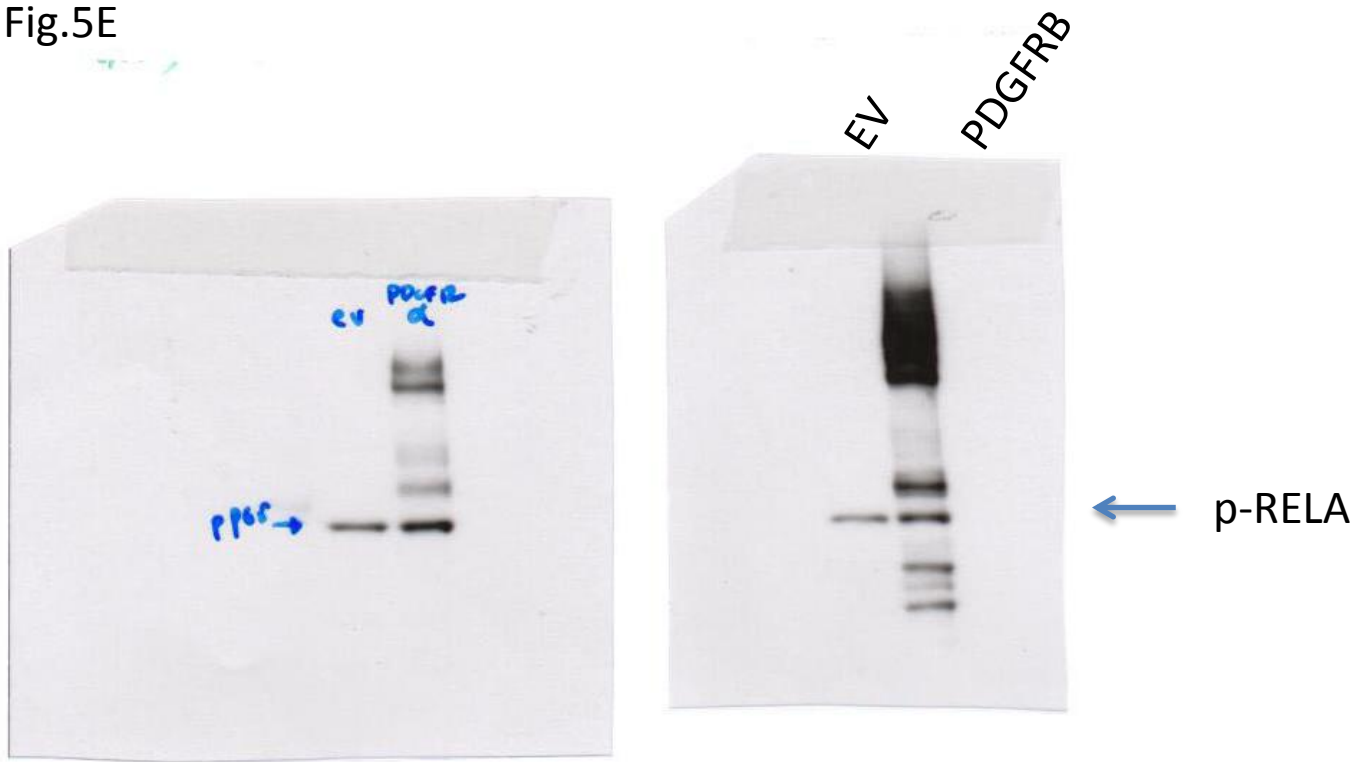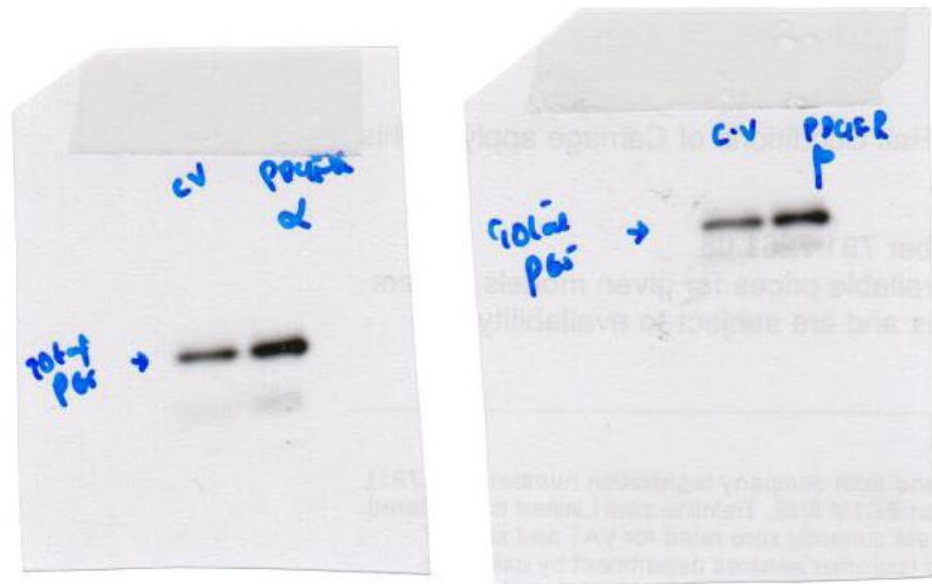

Fig.5E

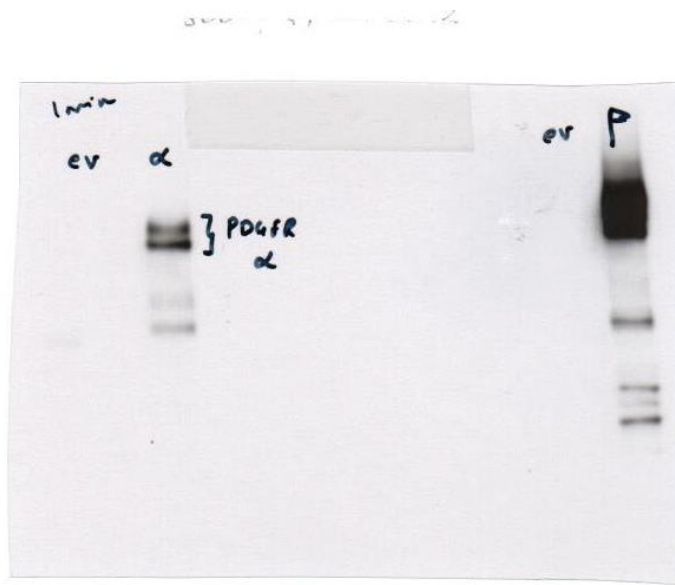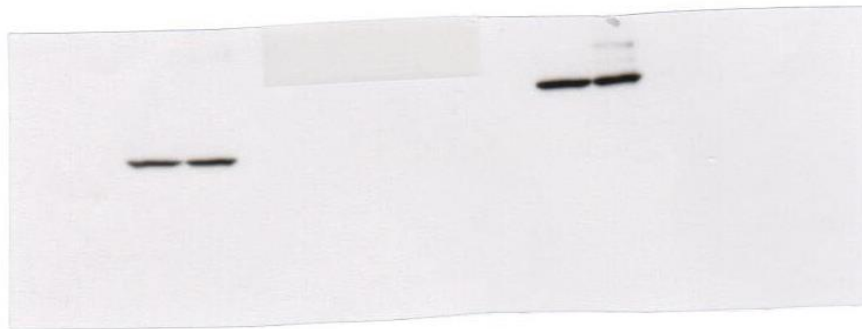

GAPDH

Fig.5H

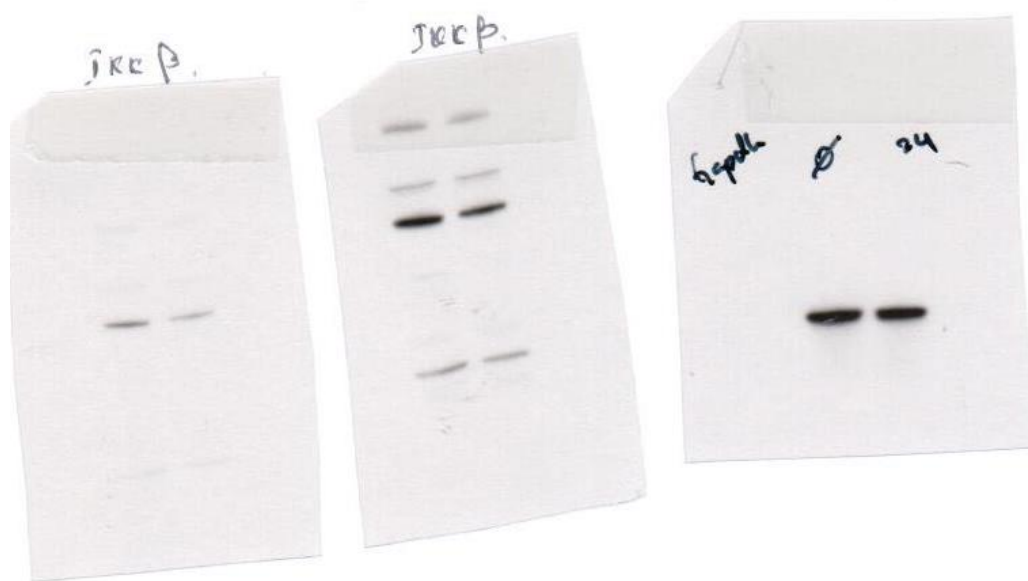

Fig.5I

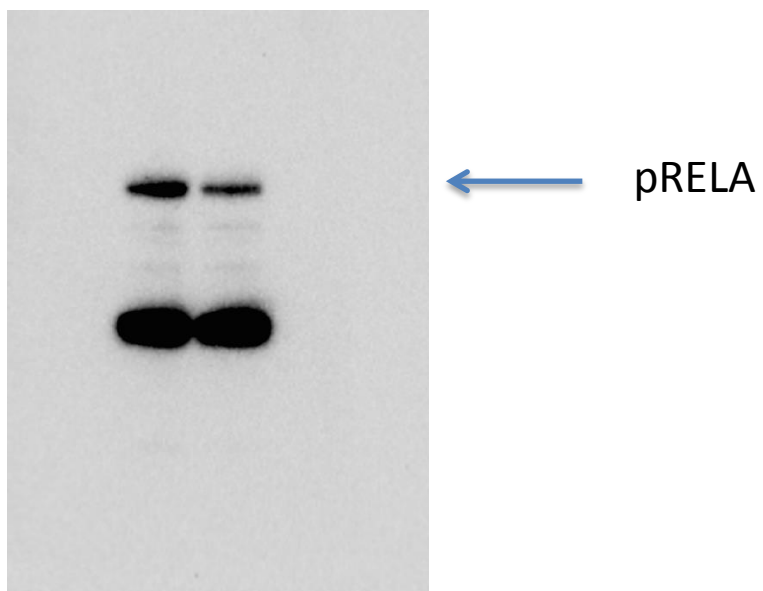

Fig.5I

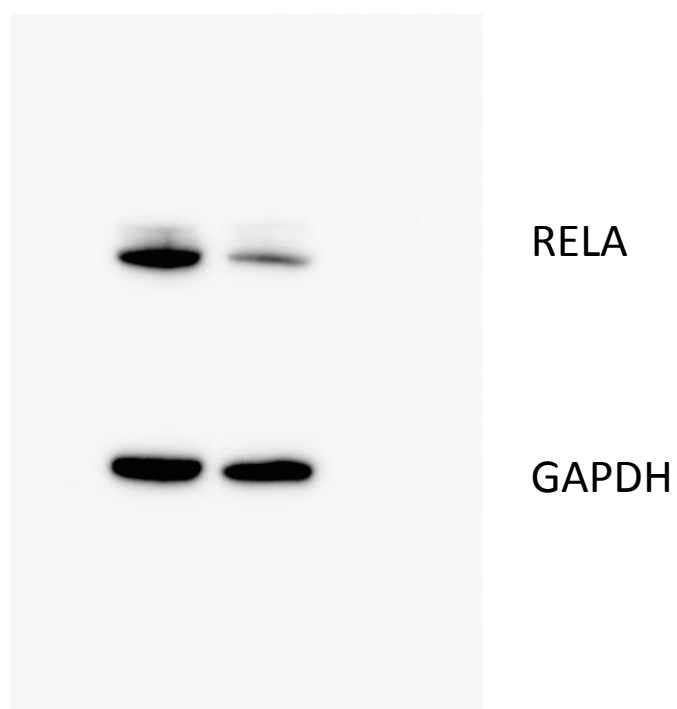

Suppl. Fig.1B

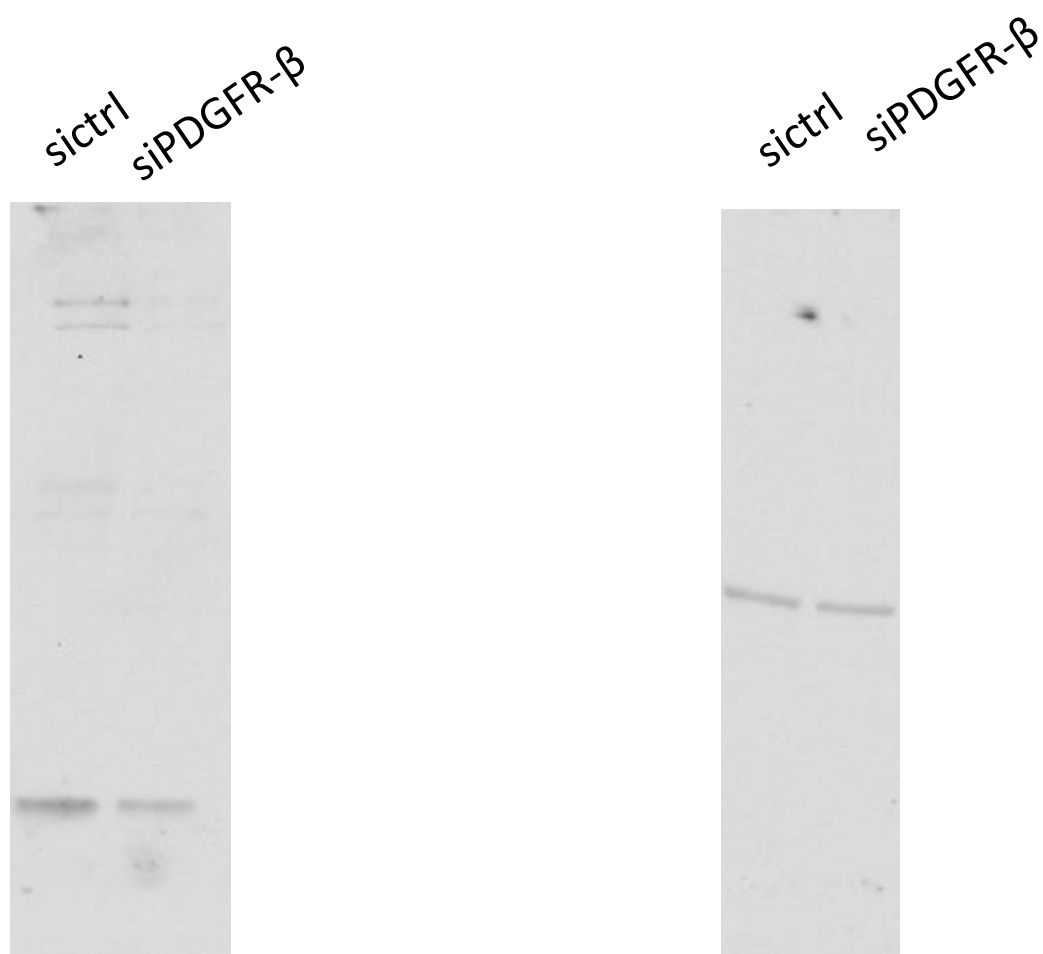

Suppl Fig. 3A

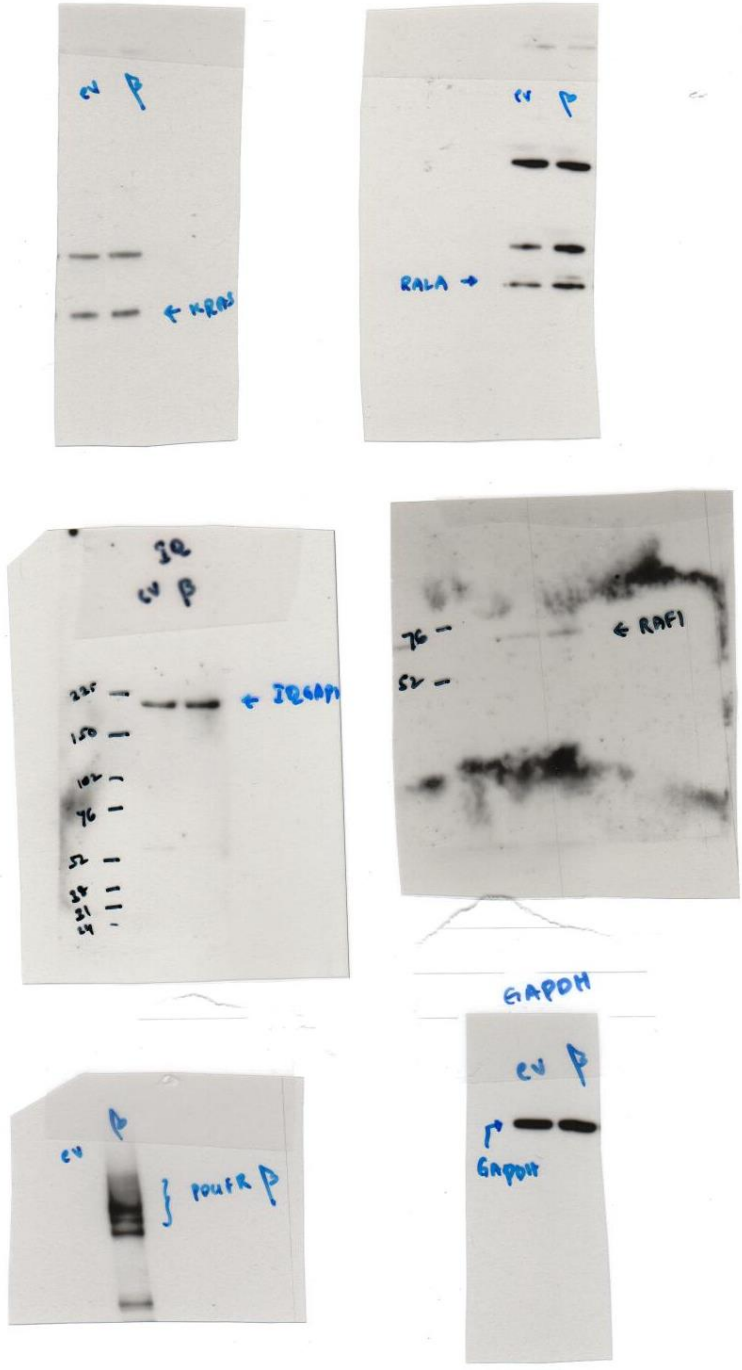

Suppl Fig. 3A

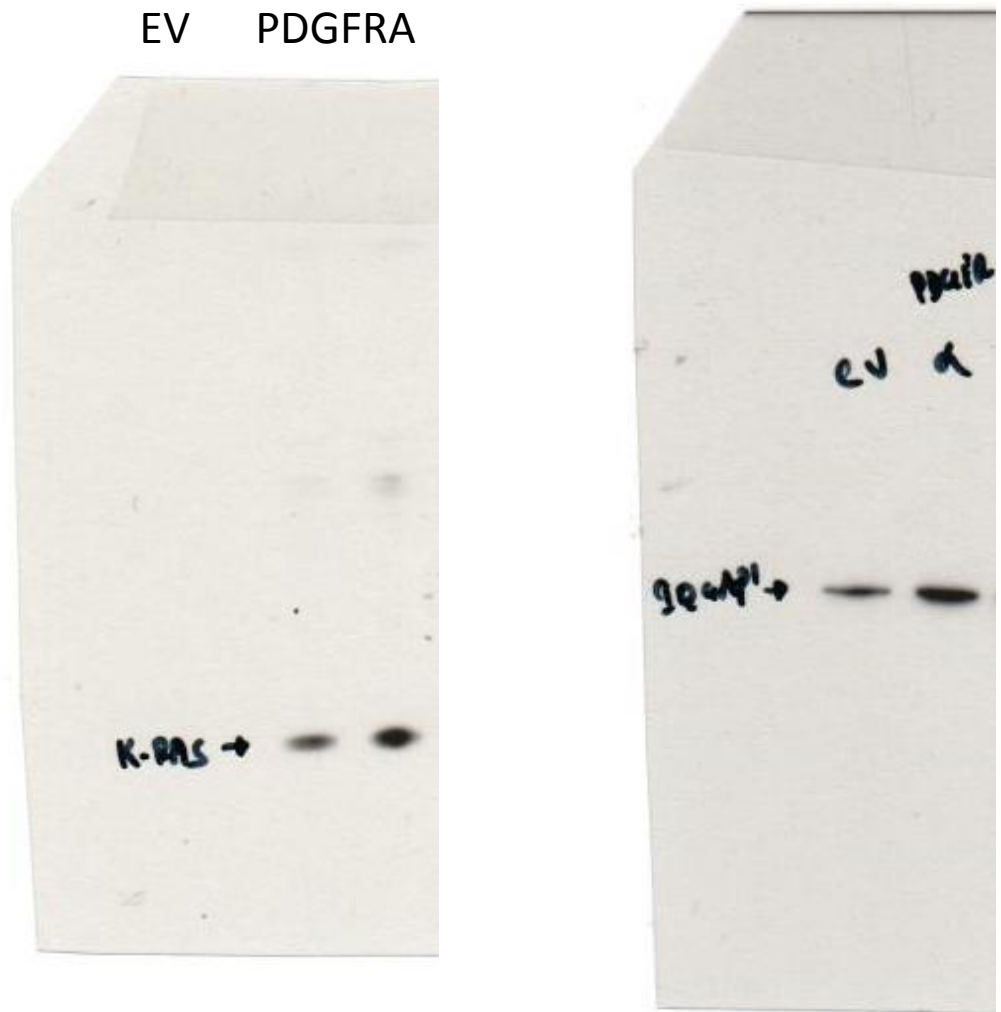

Suppl Fig. 3A

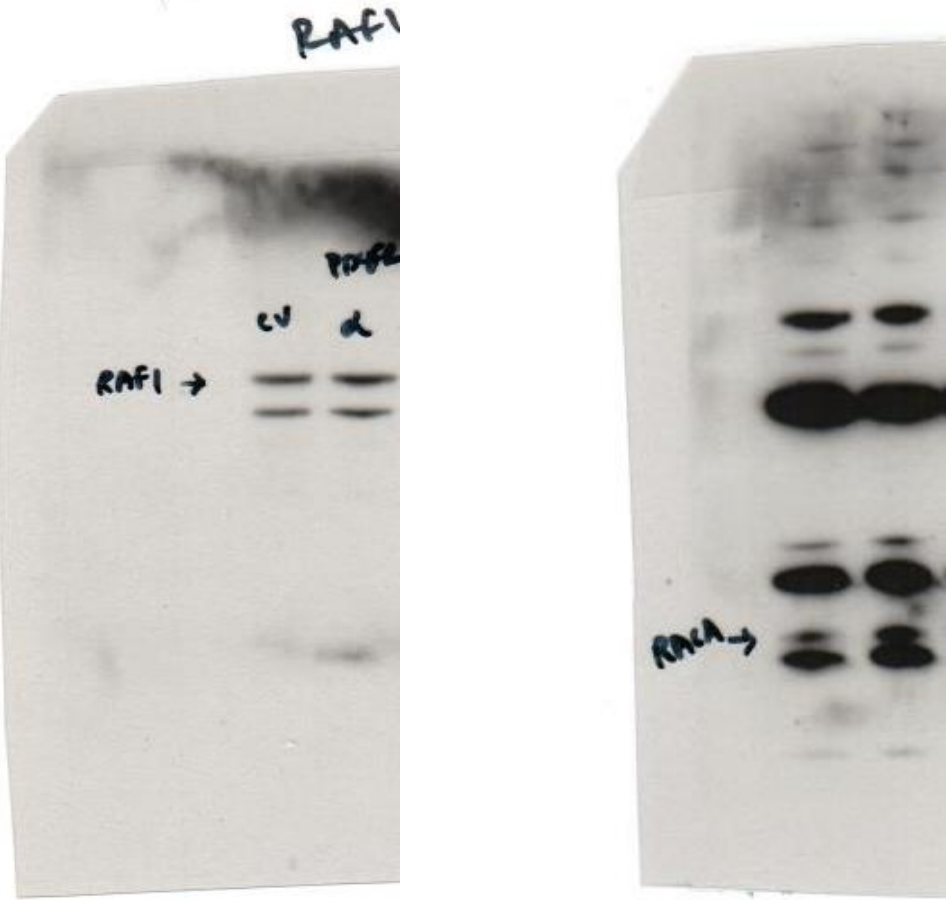

Suppl Fig. 3A

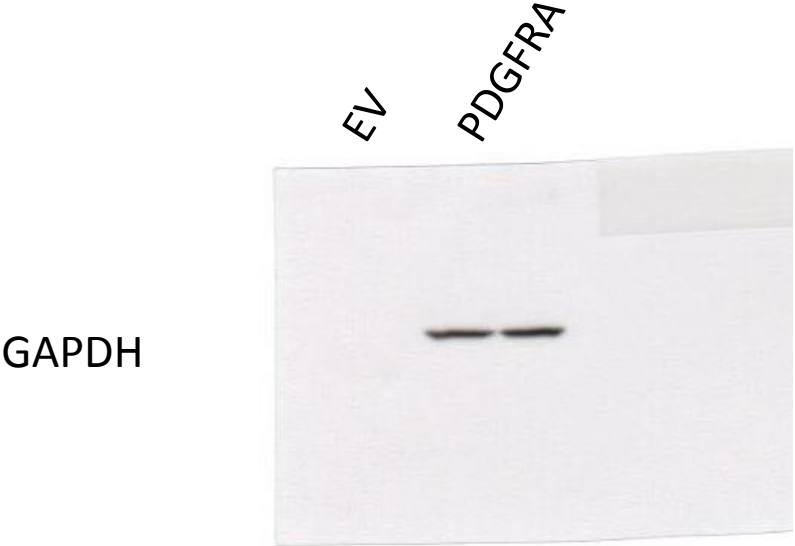



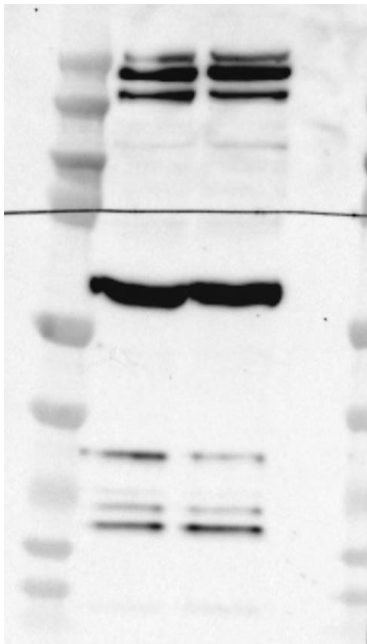

IQGAP1

RALA

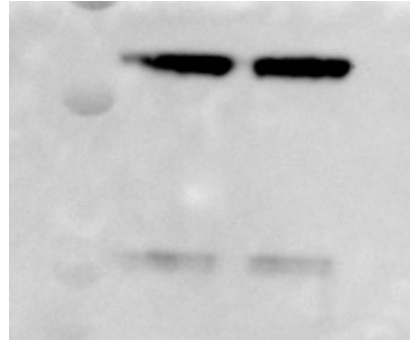

$\beta$ -actin

KRAS

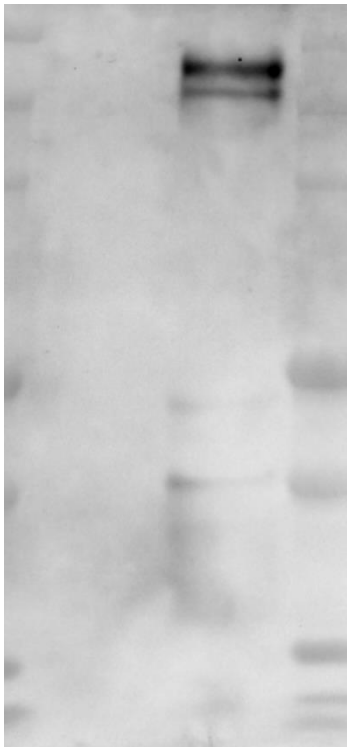

PDGFRB

Suppl. Fig.6A

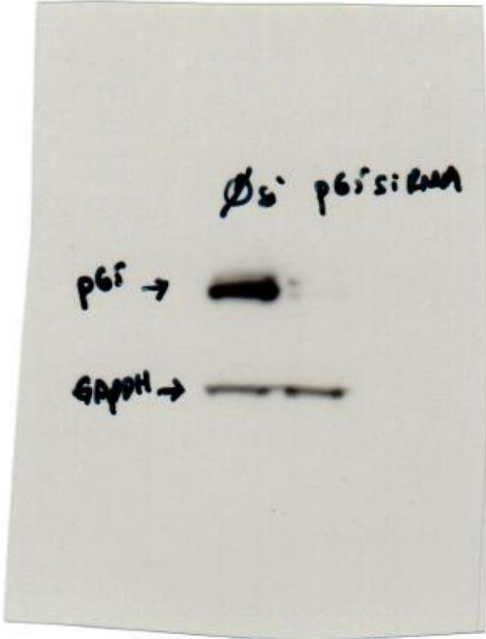

Supplement: 41598_2017_14843_MOESM1_ESM.pdf [file 41598_2017_14843_MOESM1_ESM.pdf]
